# Supplementary material
Source: Elsevier journal article supplement (https://comptes-rendus.academie-sciences.fr/chimie/article/10.1016/j.crci.2009.11.004/file/attach/mmc1.pdf)

**Supporting Information**  
Selected NMR spectra

Compound **6c**:  $^1\text{H}$  NMR in  $\text{CDCl}_3$

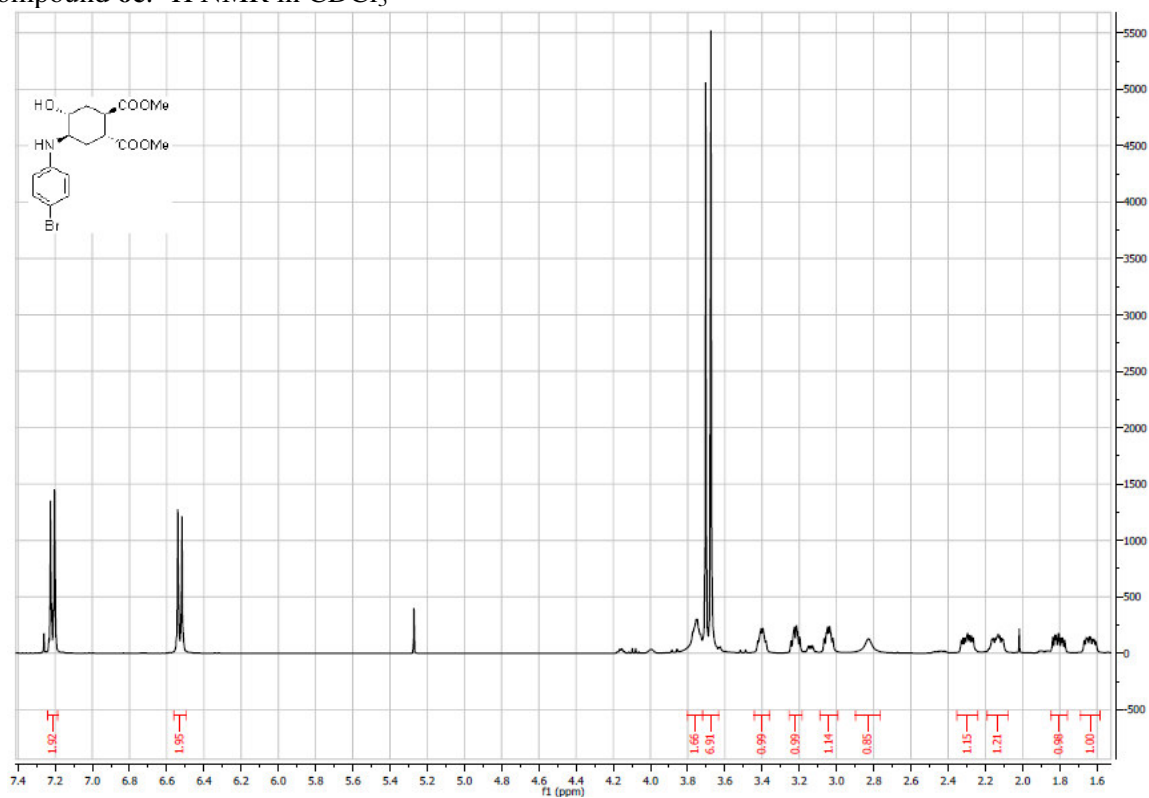

Compound **6c**:  $^{13}\text{C}$  NMR in  $\text{CDCl}_3$

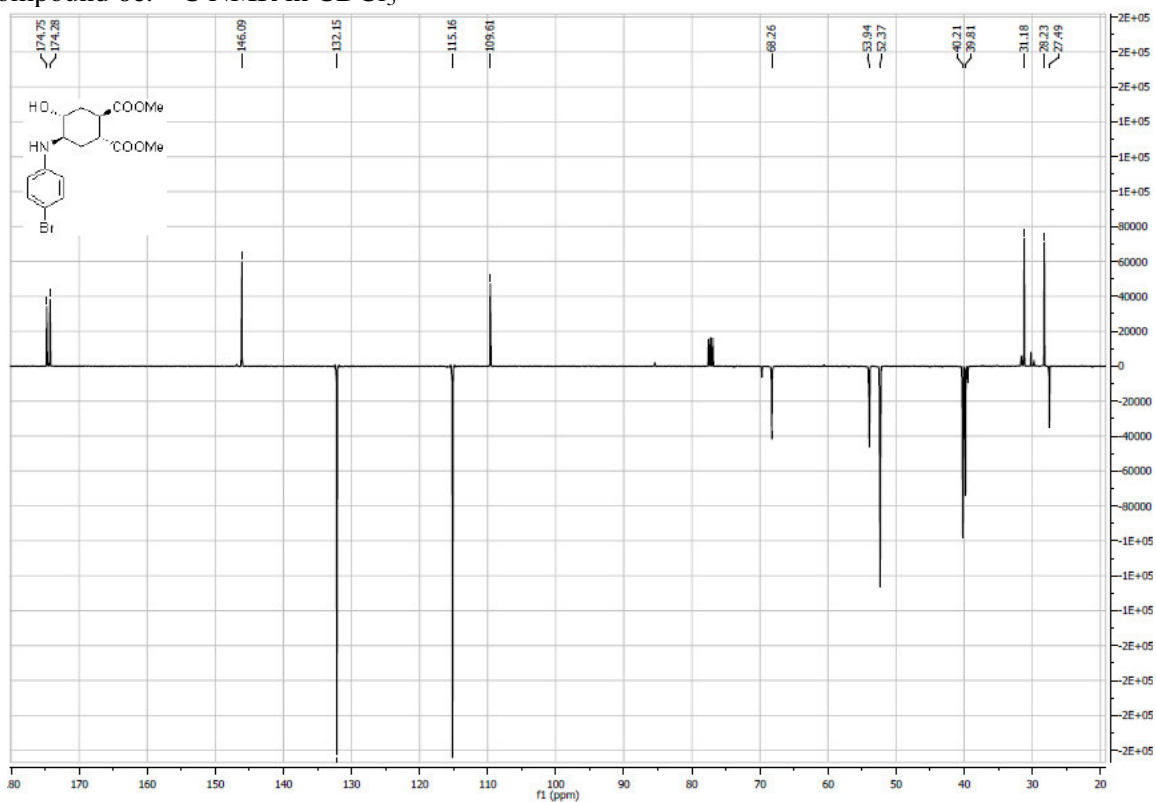

Compound **6d**:  $^1\text{H}$  NMR in  $\text{CDCl}_3$

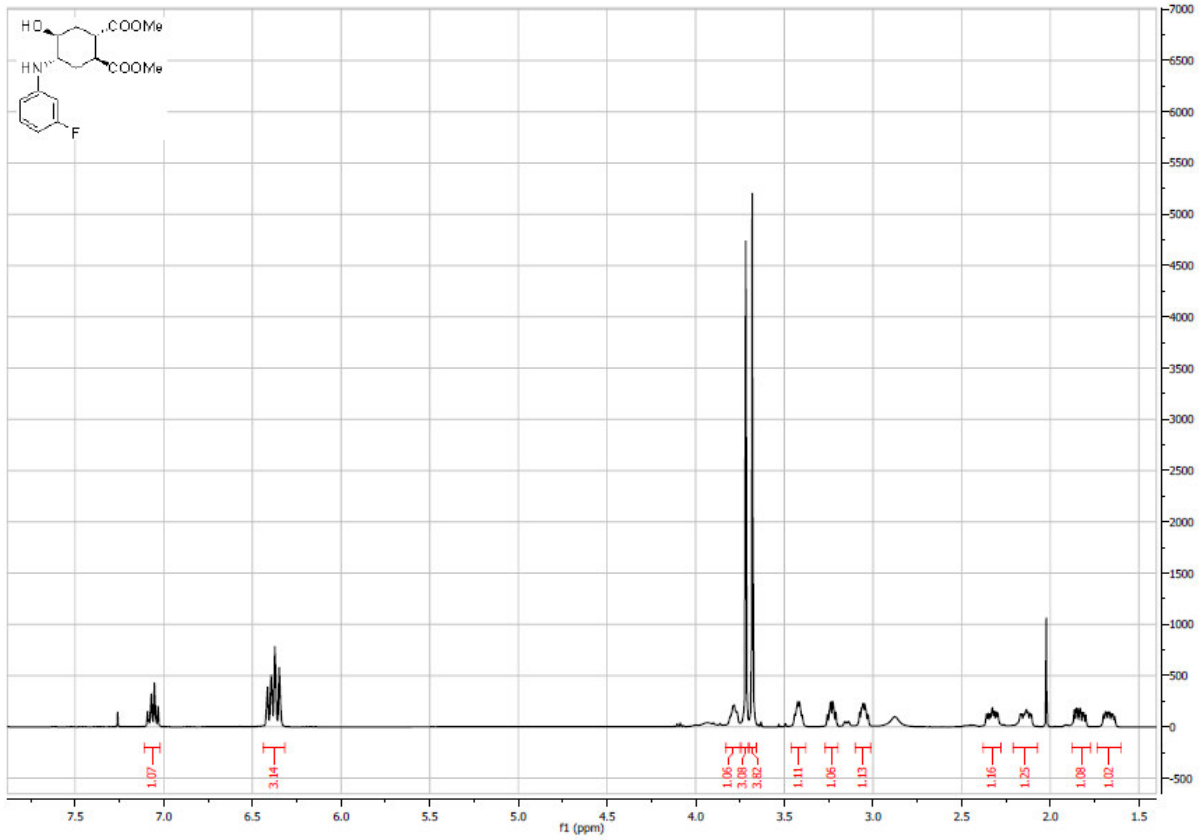

Compound **6d**:  $^{13}\text{C}$  NMR in  $\text{CDCl}_3$

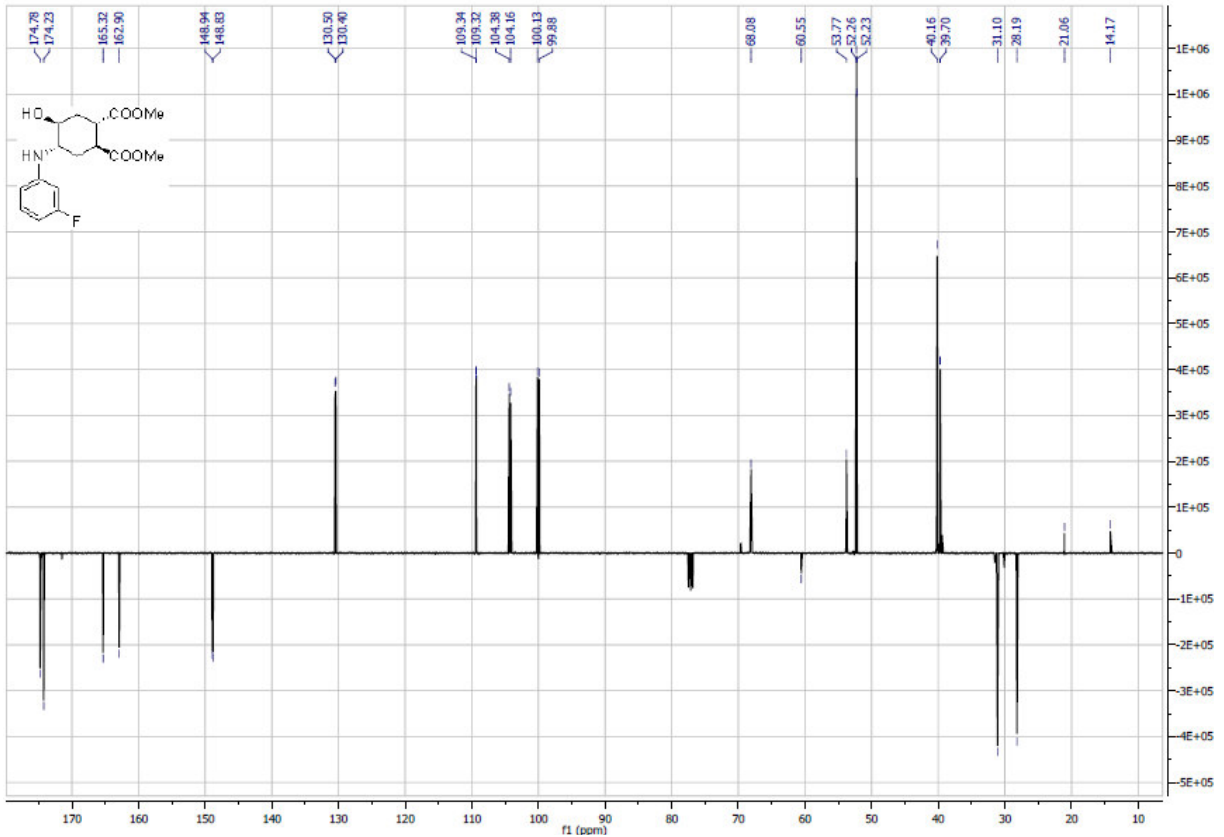

Compound 6e:  $^1\text{H}$  NMR in  $\text{CDCl}_3$

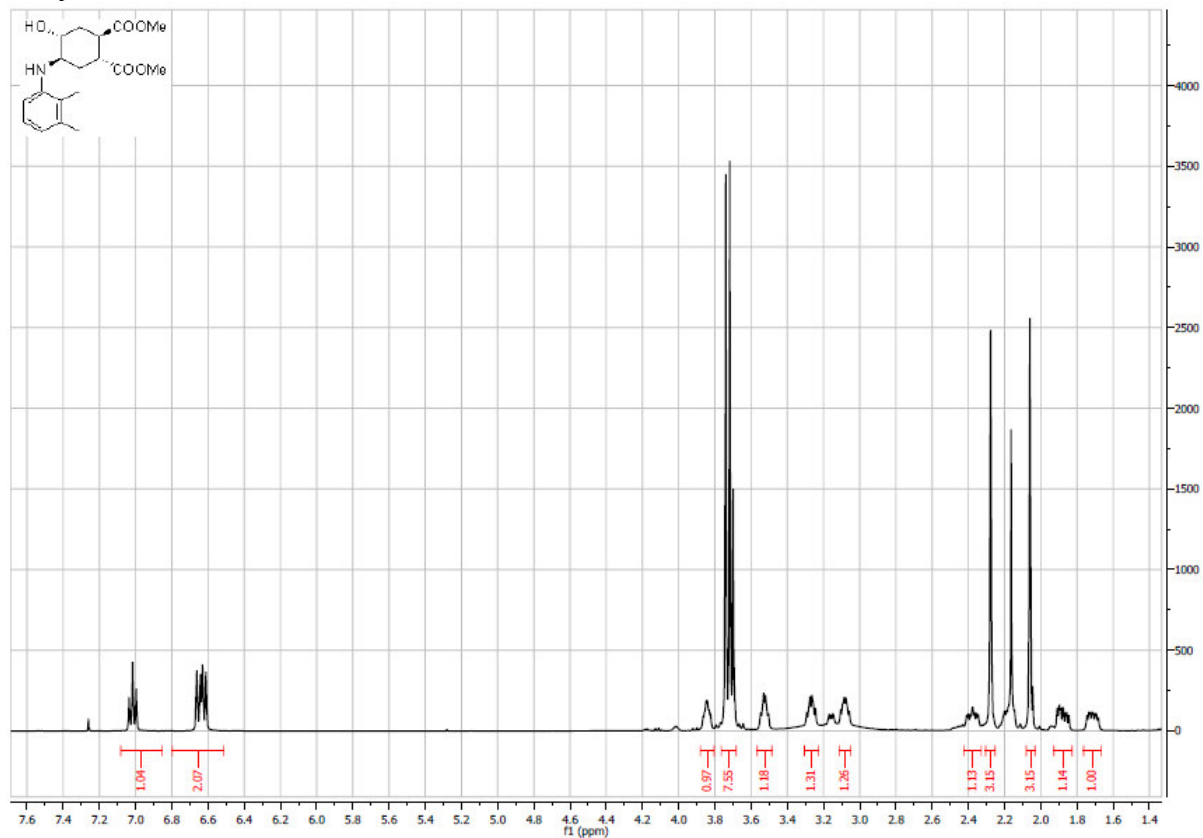

Compound 6e:  $^{13}\text{C}$  NMR in  $\text{CDCl}_3$

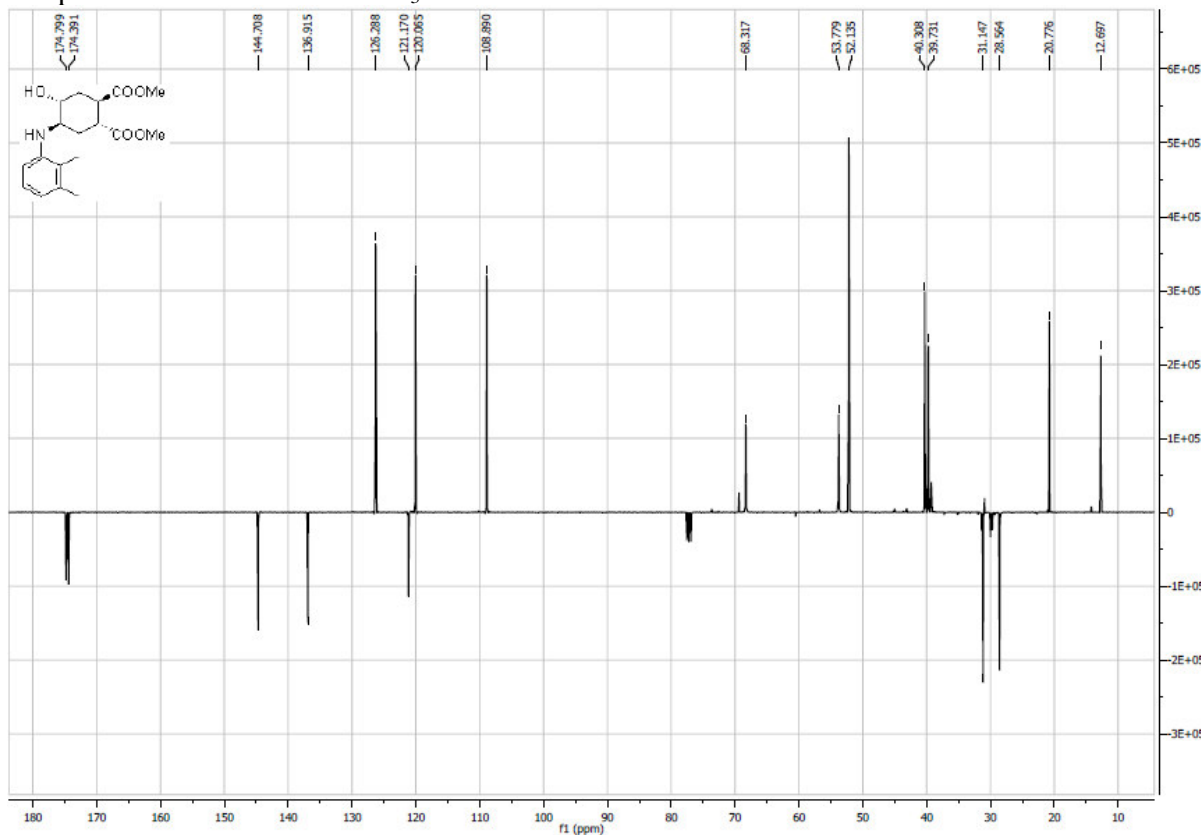

Compound **6f**:  $^1\text{H}$  NMR in  $\text{CDCl}_3$

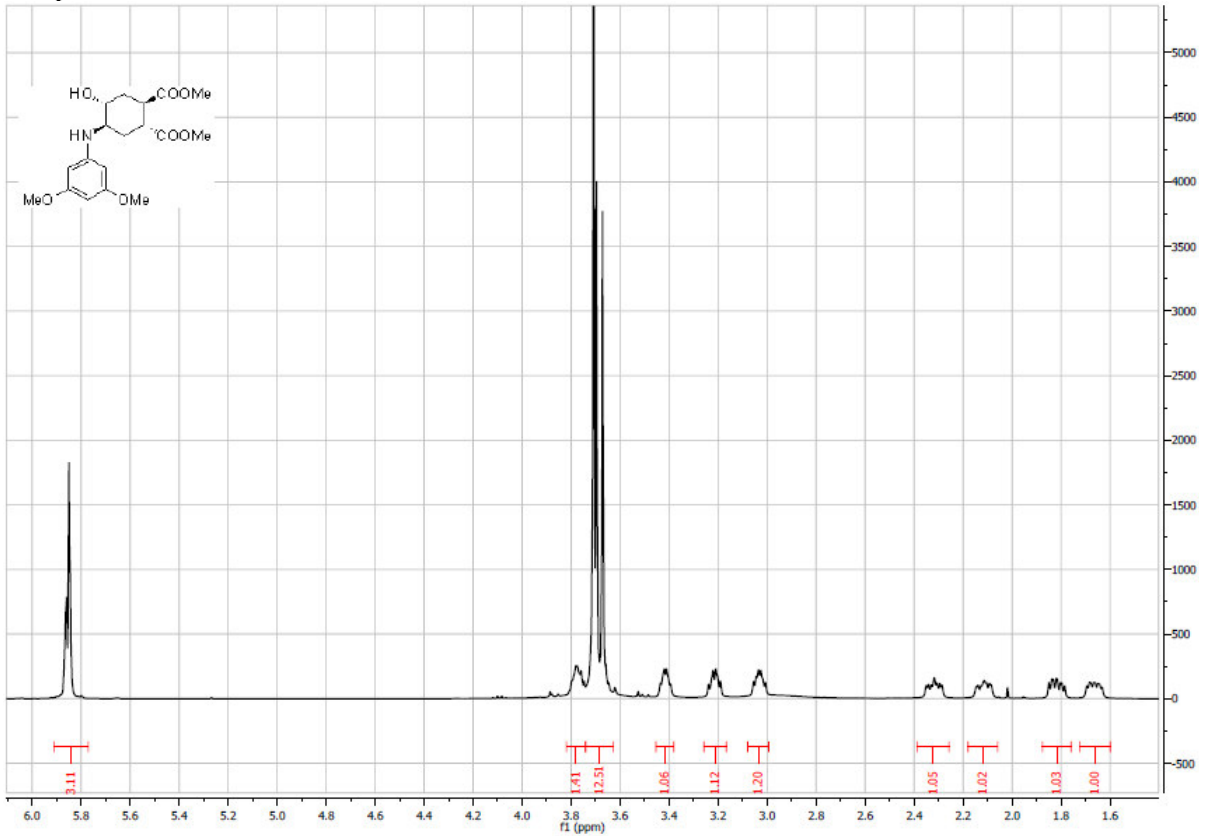

Compound **6f**:  $^{13}\text{C}$  NMR in  $\text{CDCl}_3$

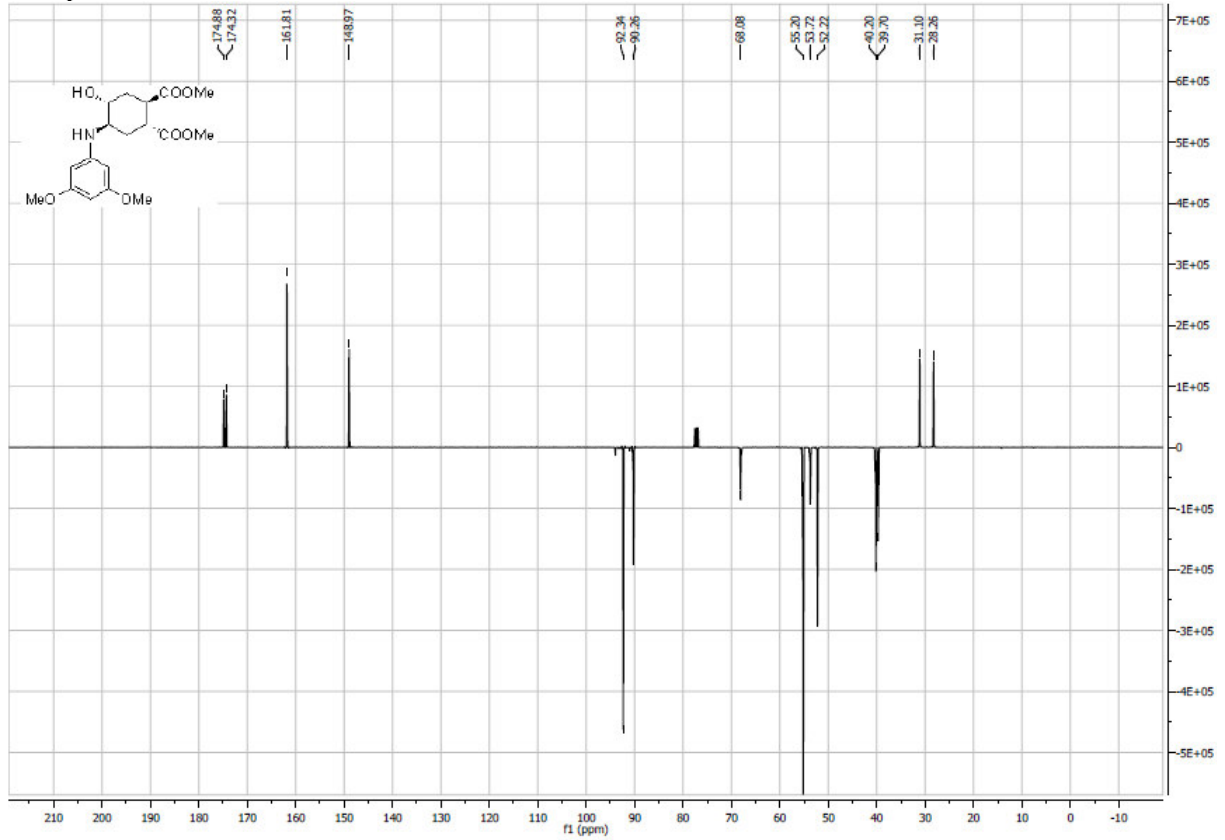

Compound **6g**:  $^1\text{H}$  NMR in  $\text{CDCl}_3$

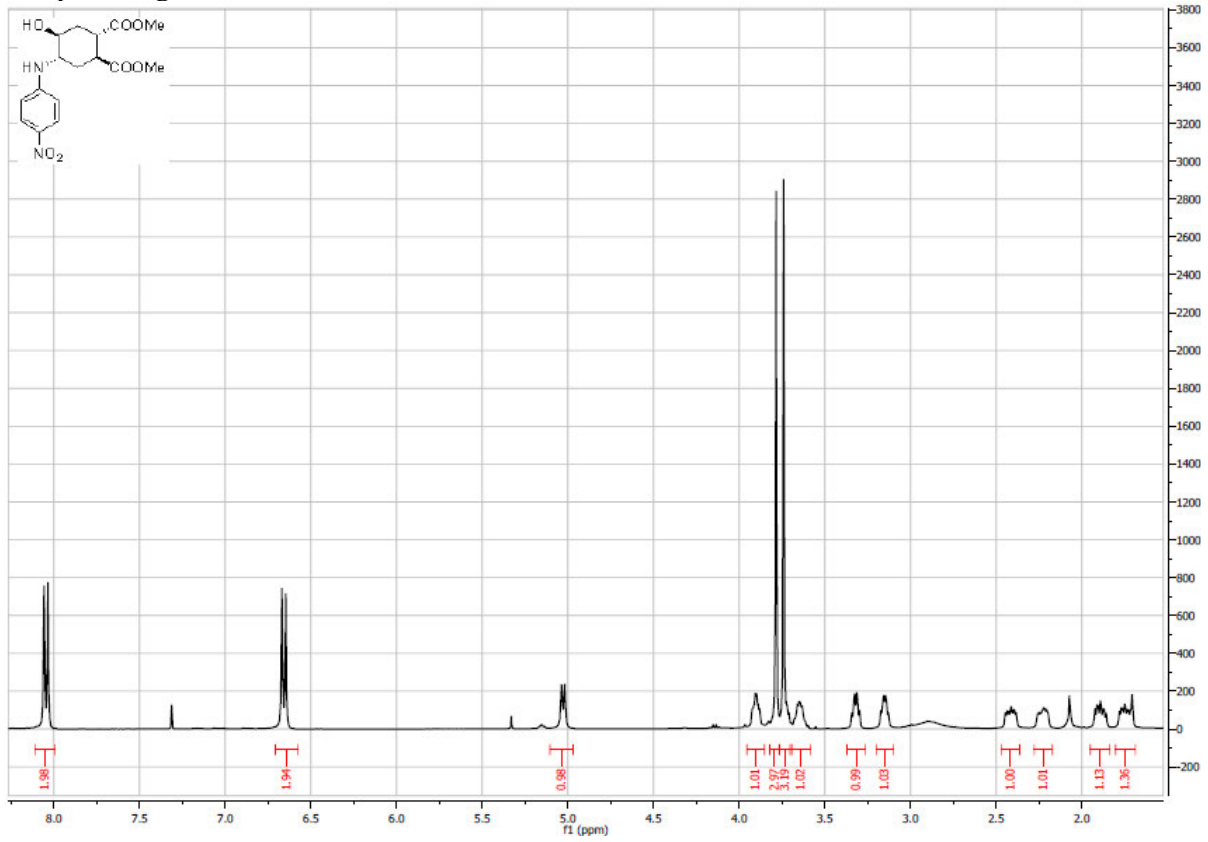

Compound **6g**:  $^{13}\text{C}$  NMR in  $\text{CDCl}_3$

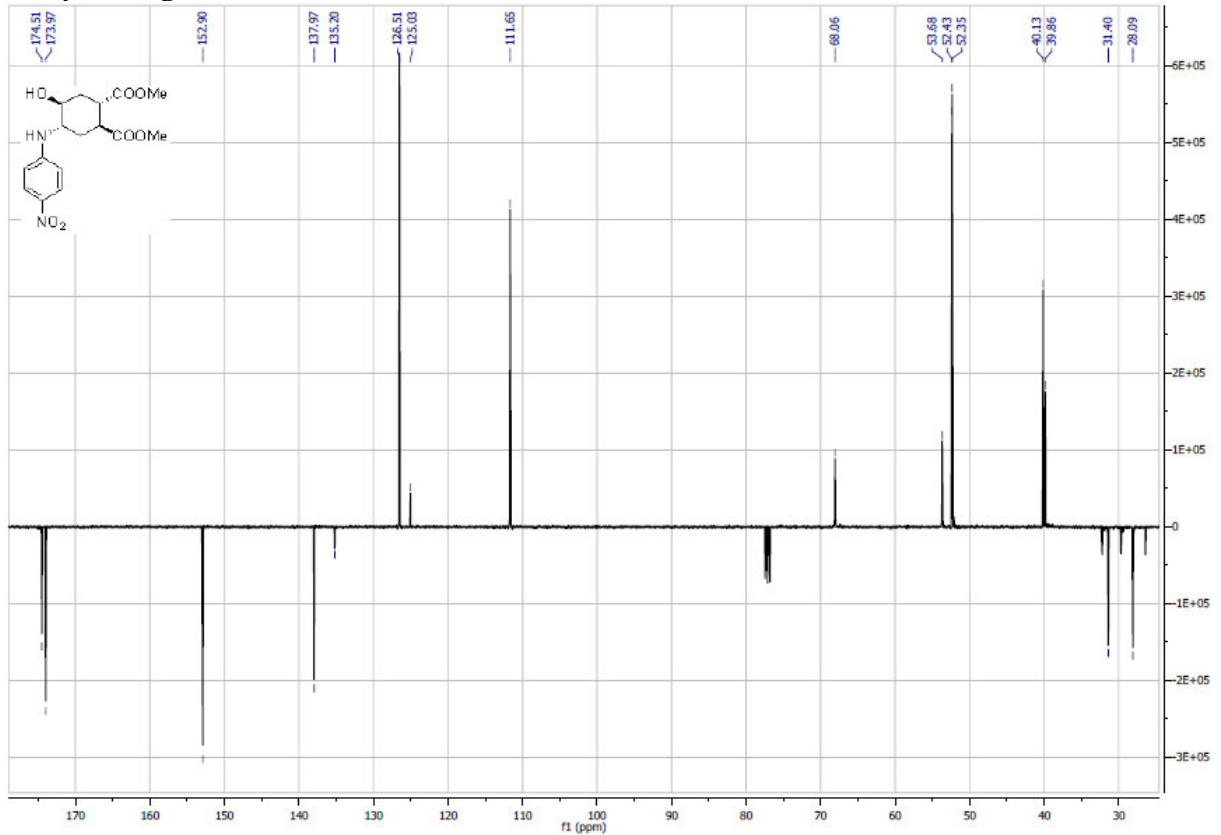

Compound **6h**:  $^1\text{H}$  NMR in  $\text{CDCl}_3$

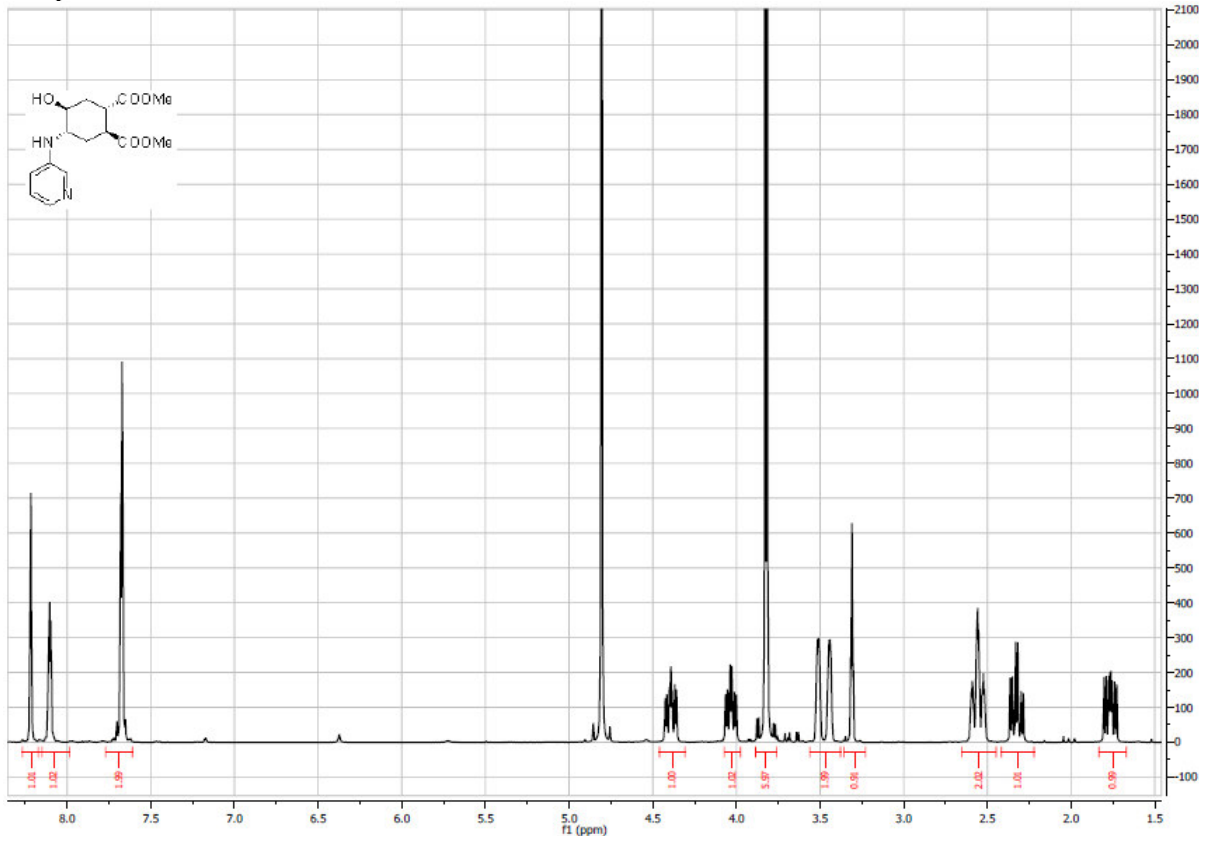

Compound **6h**:  $^{13}\text{C}$  NMR in  $\text{CDCl}_3$

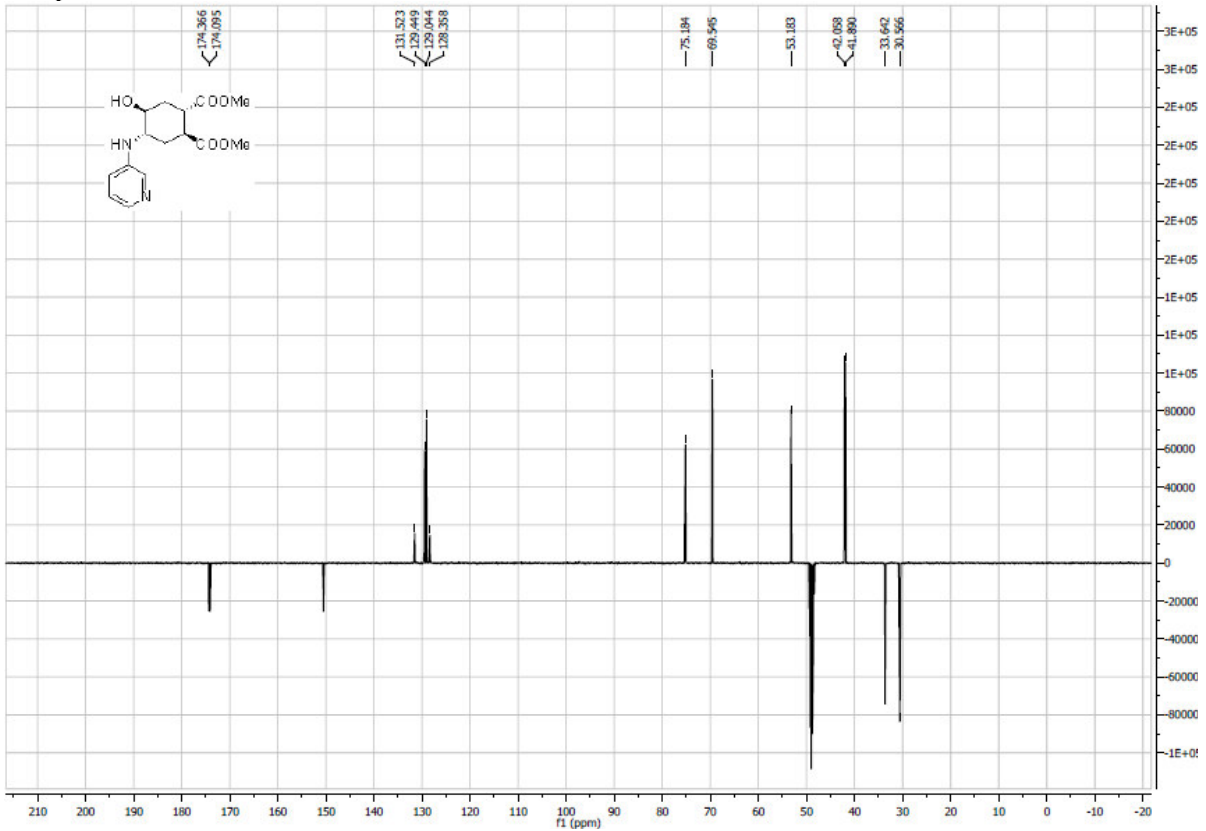

Compound 7a:  $^1\text{H}$  NMR in  $\text{CDCl}_3$

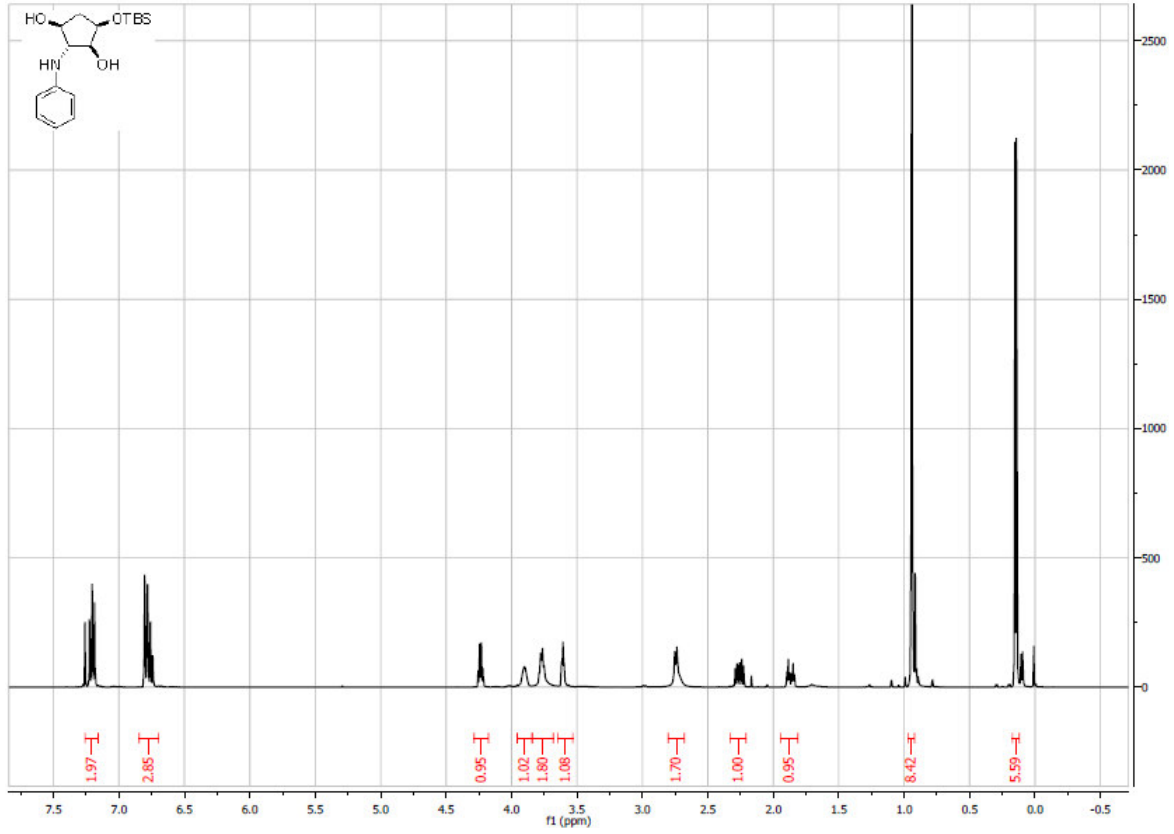

Compound 7a:  $^{13}\text{C}$  NMR in  $\text{CDCl}_3$

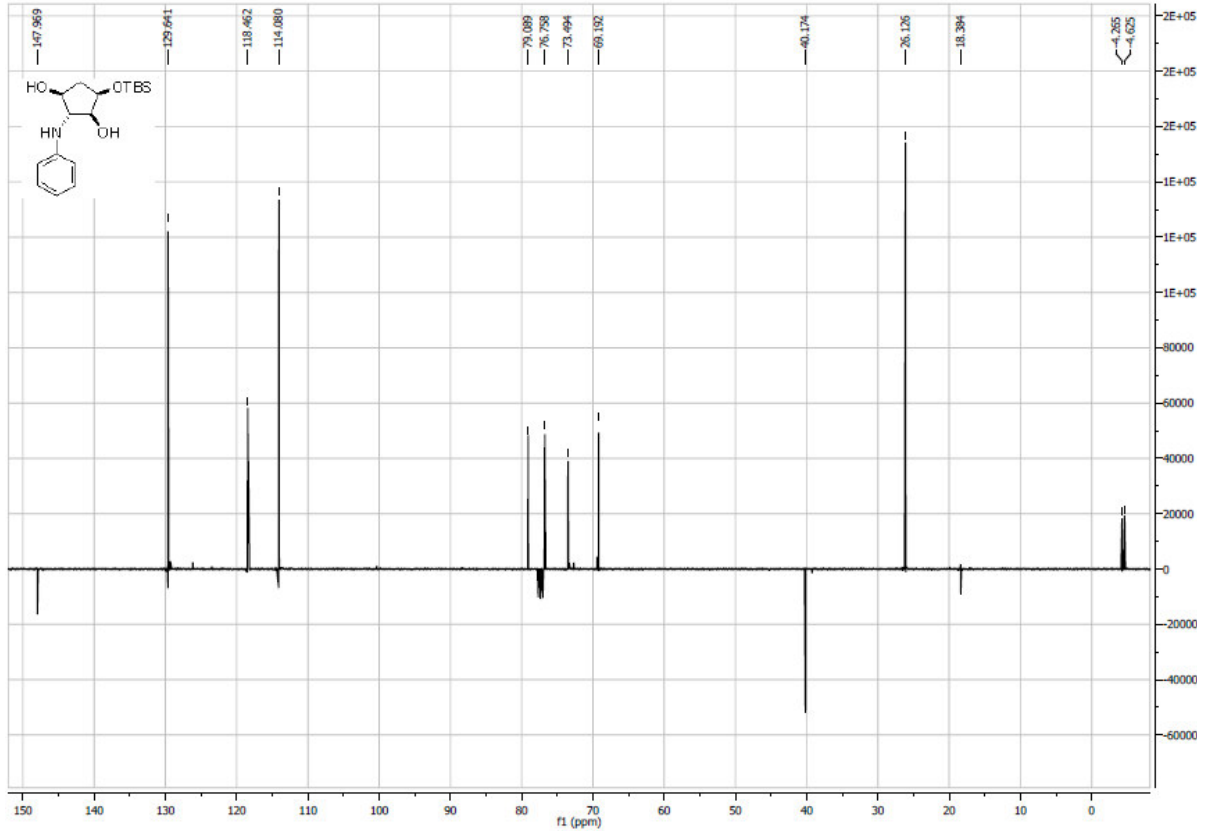

Compound **7b**:  $^1\text{H}$  NMR in  $\text{CDCl}_3$

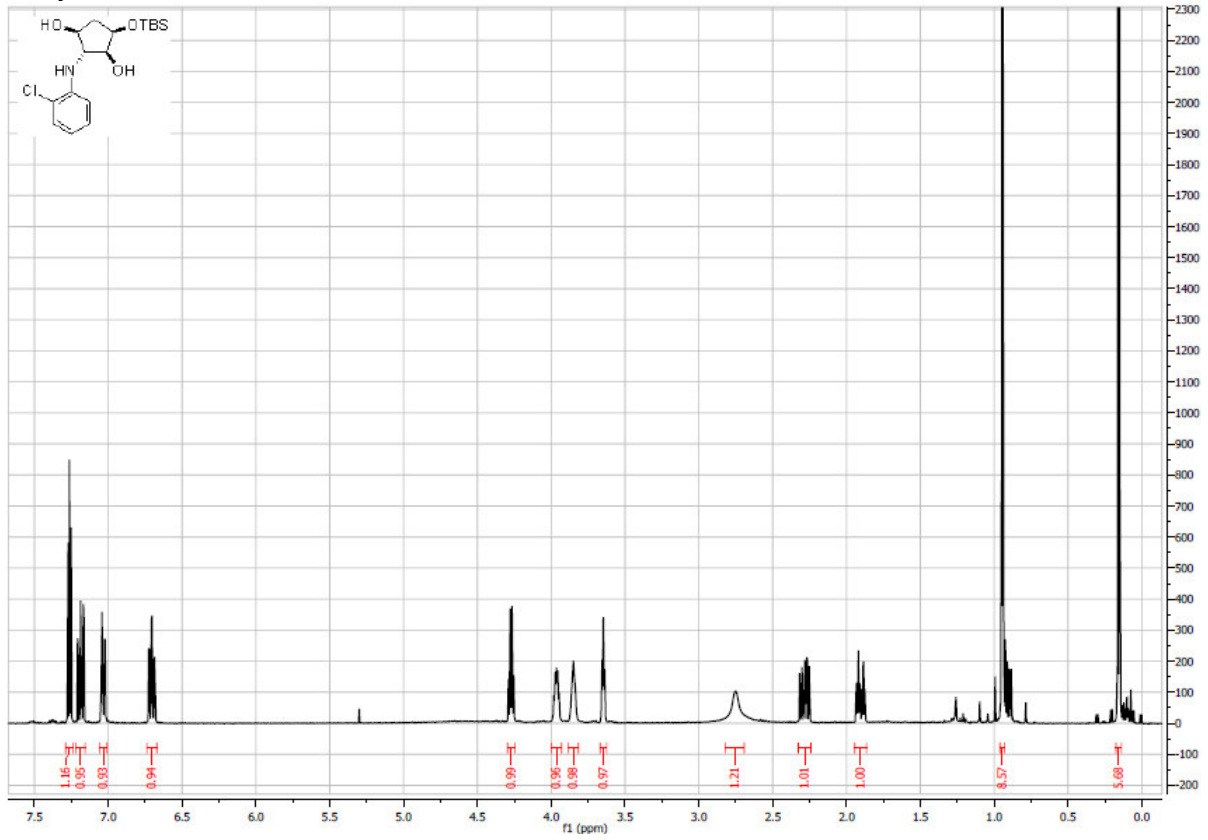

Compound **7b**:  $^{13}\text{C}$  NMR in  $\text{CDCl}_3$

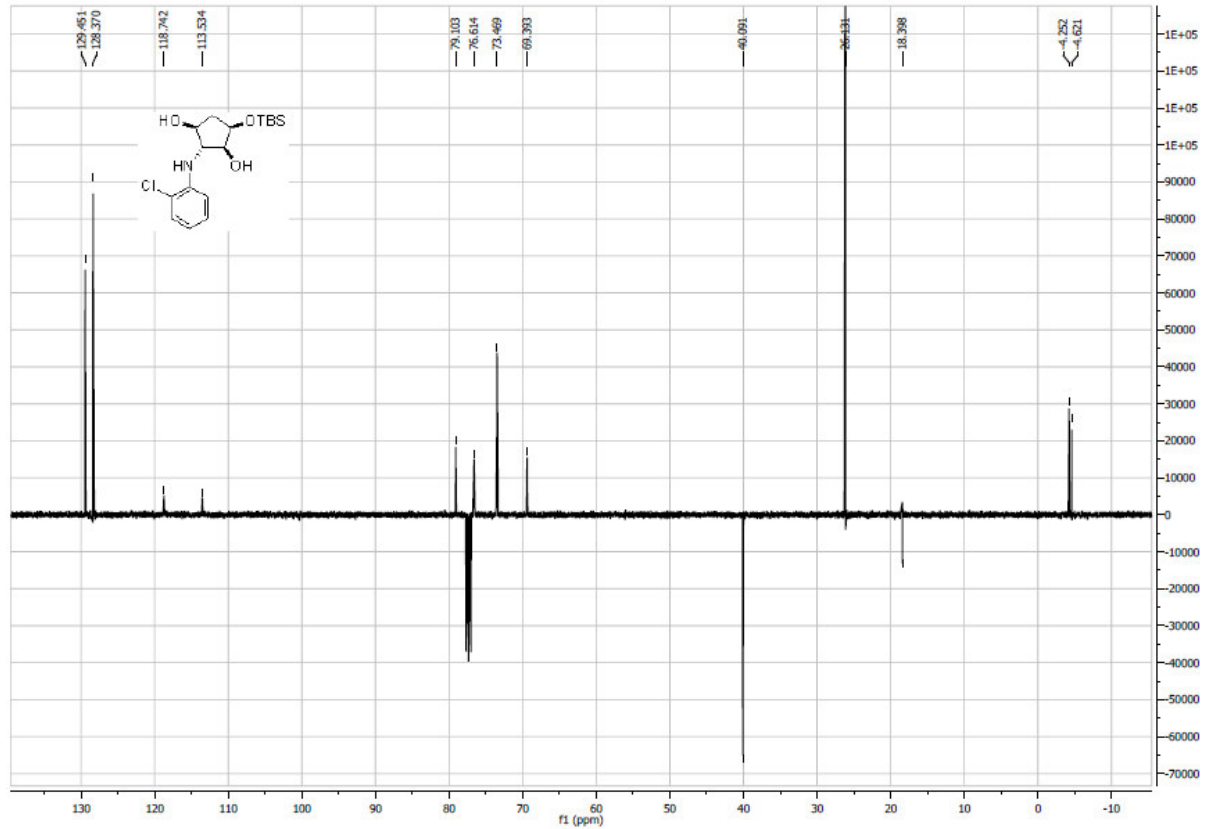



Compound 7c:  $^1\text{H}$  NMR in  $\text{CDCl}_3$

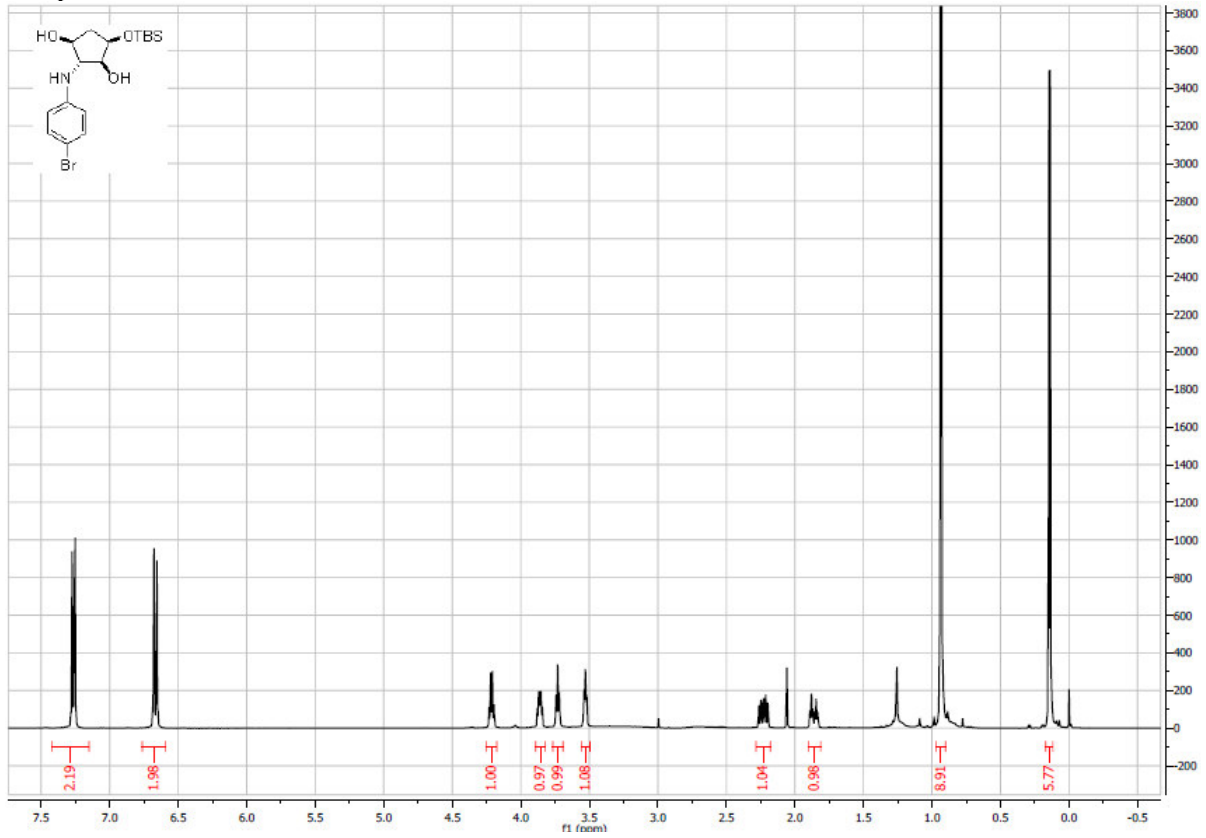

Compound 7c:  $^{13}\text{C}$  NMR in  $\text{CDCl}_3$

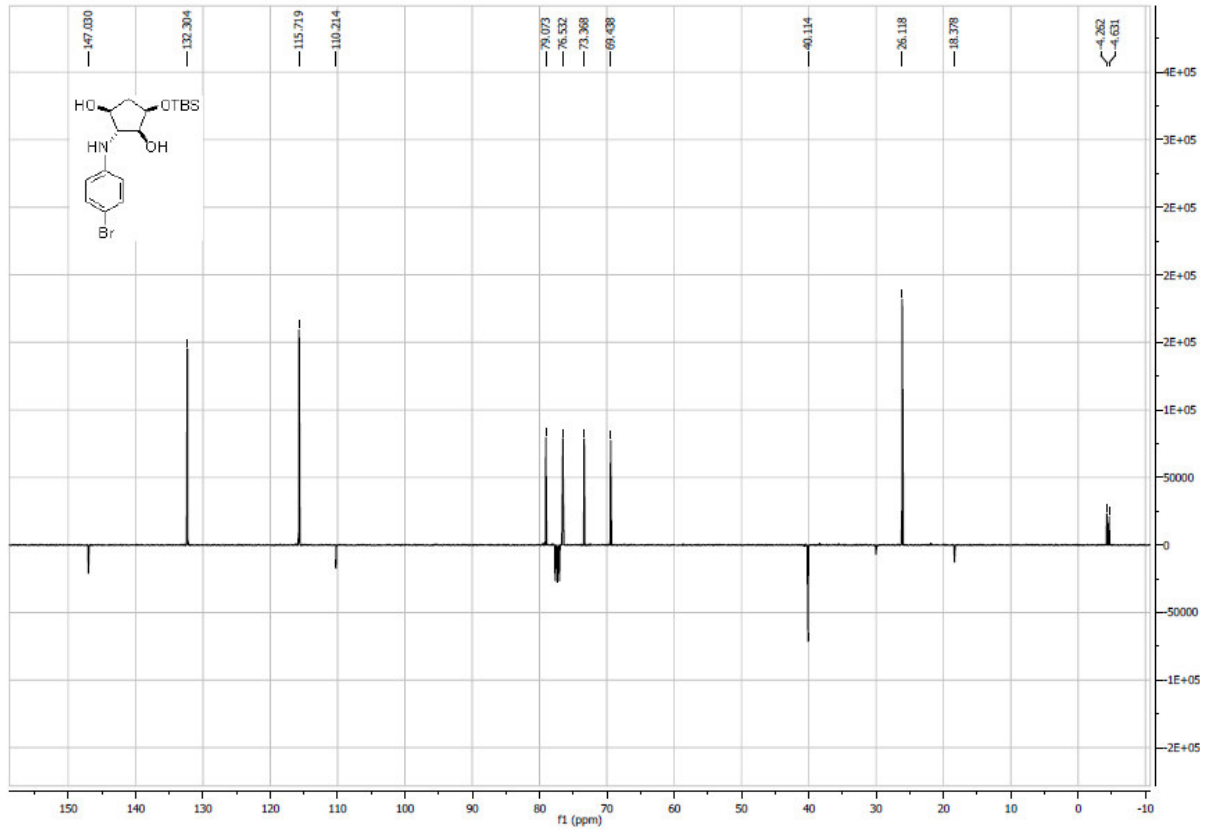

Compound 7d:  $^1\text{H}$  NMR in  $\text{CDCl}_3$

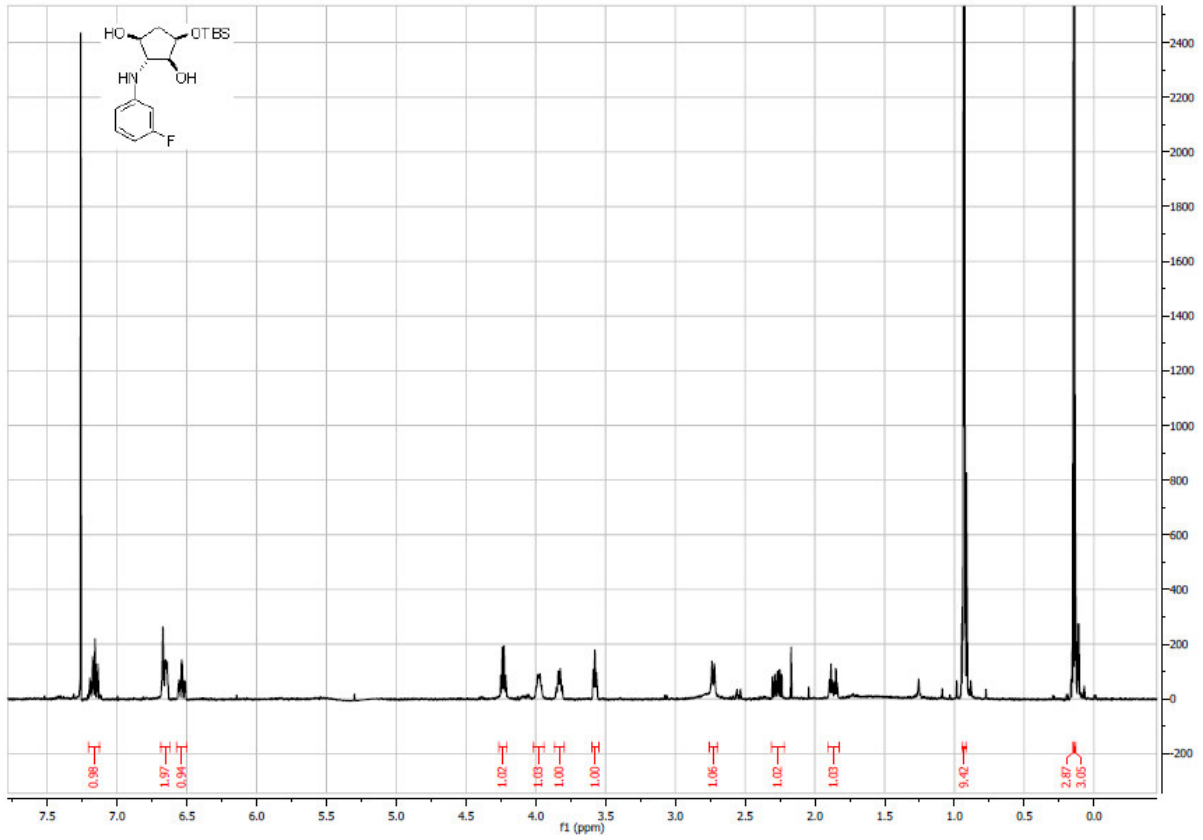

Compound 7d:  $^{13}\text{C}$  NMR in  $\text{CDCl}_3$

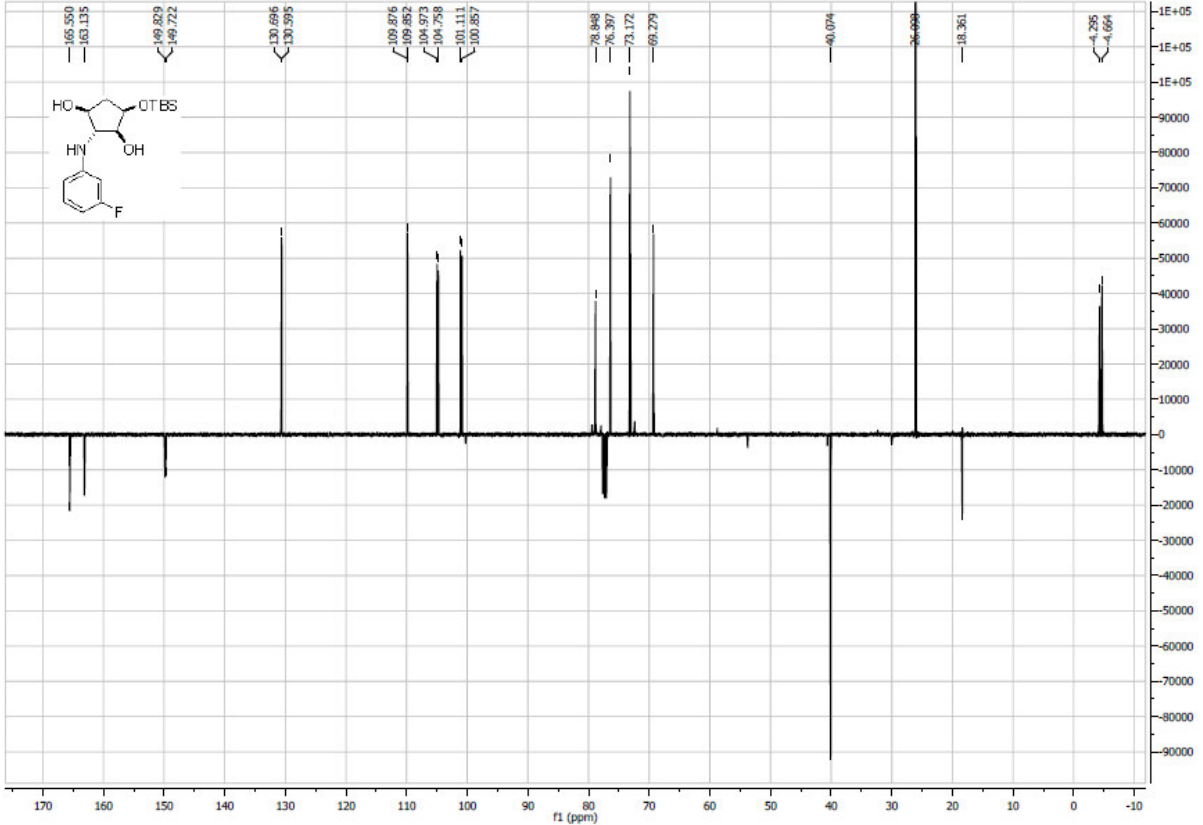

Compound 7e:  $^1\text{H}$  NMR in  $\text{CDCl}_3$

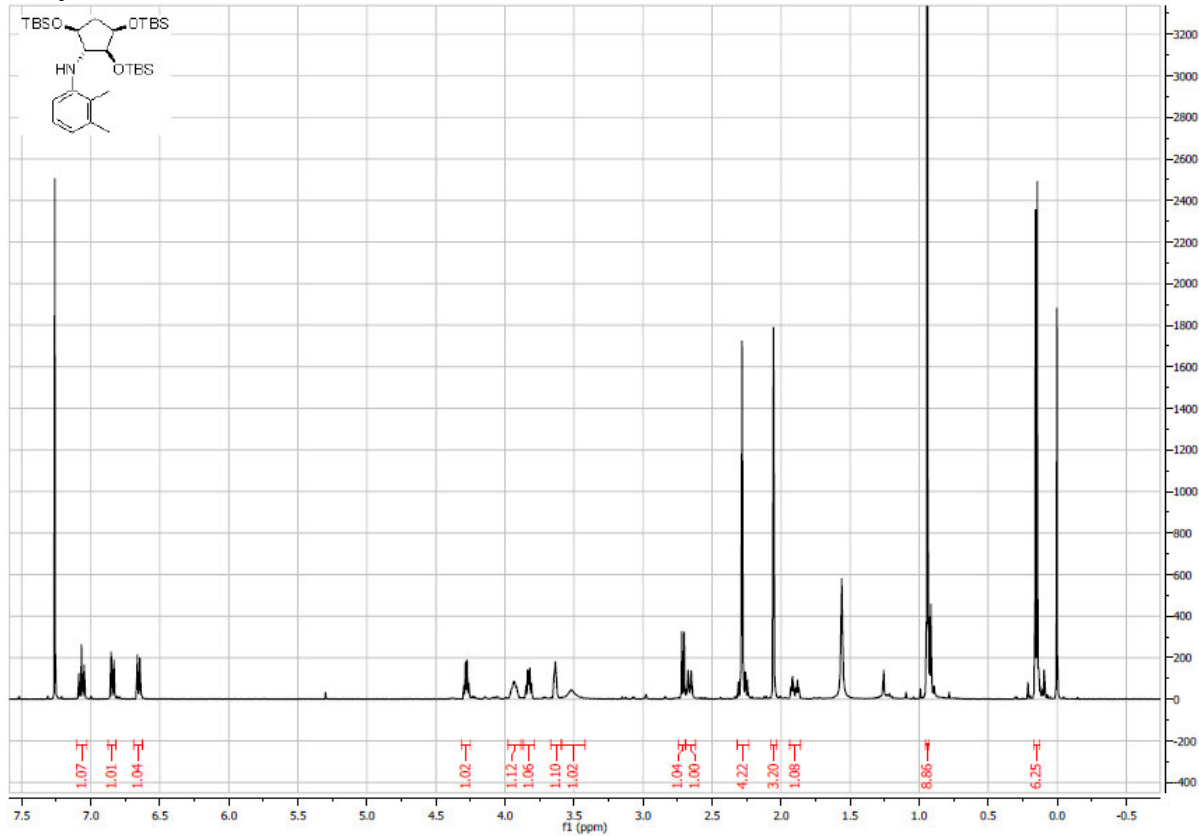

Compound 7d:  $^{13}\text{C}$  NMR in  $\text{CDCl}_3$

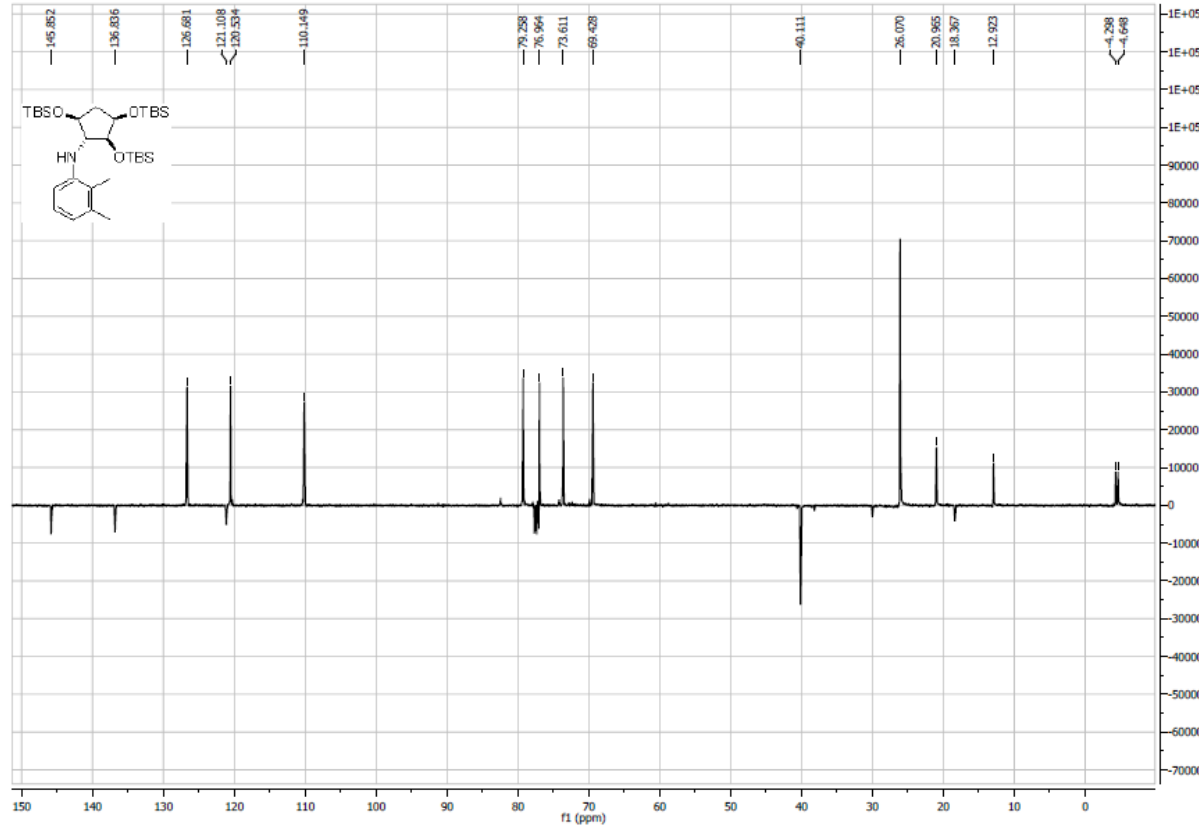

Compound 7f:  $^1\text{H}$  NMR in  $\text{CDCl}_3$

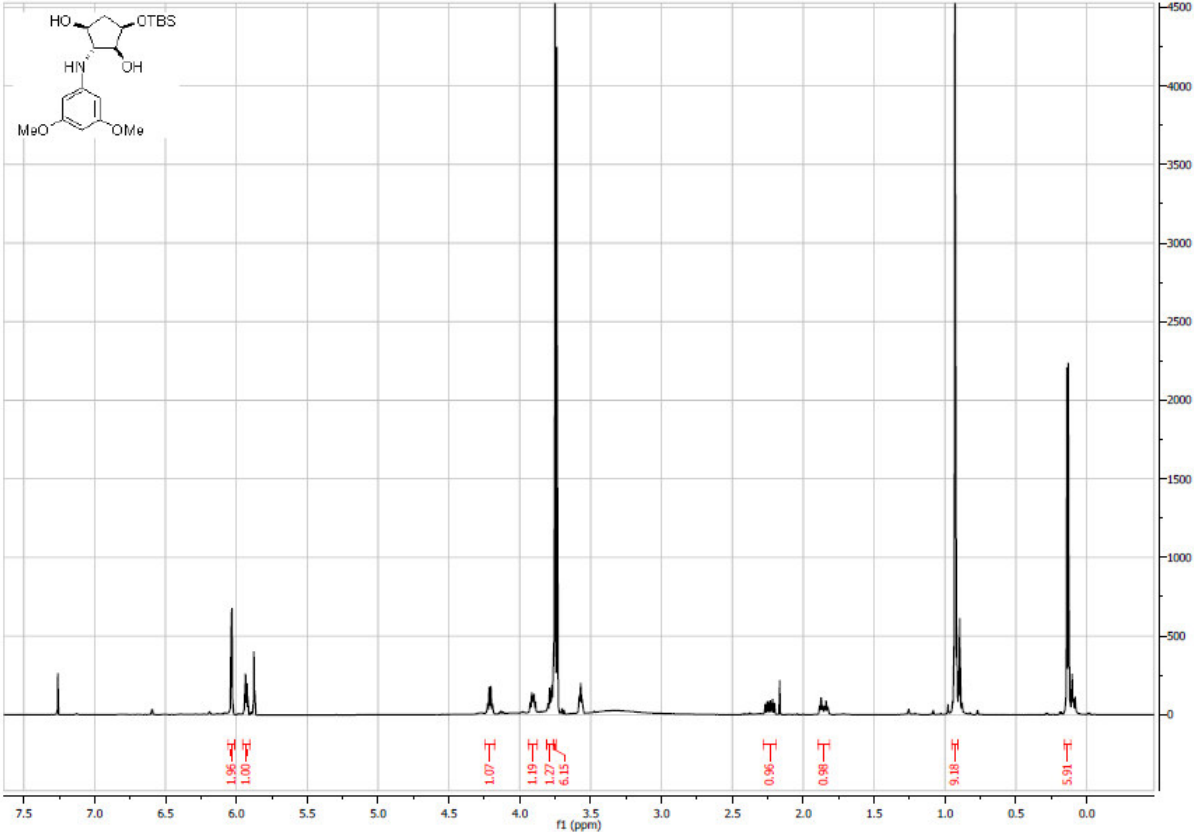

Compound 7f:  $^{13}\text{C}$  NMR in  $\text{CDCl}_3$

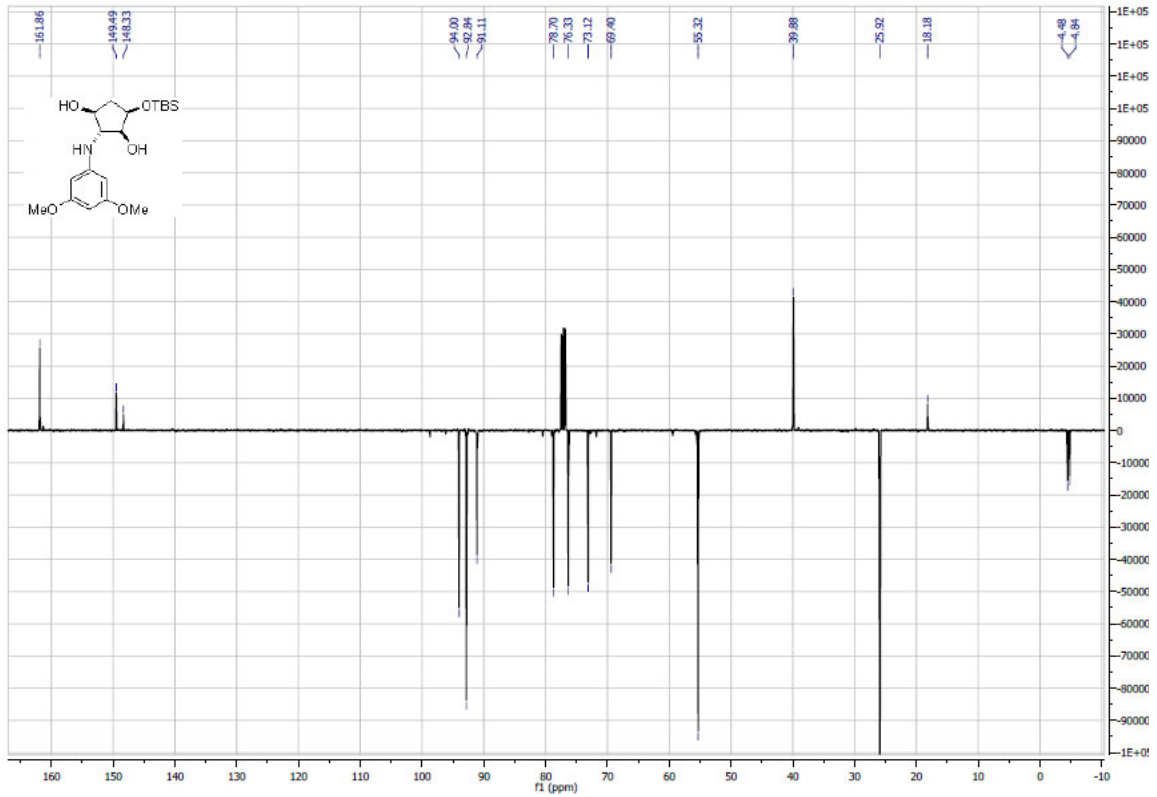

Compound **8a**:  $^1\text{H}$  NMR in  $\text{CDCl}_3$

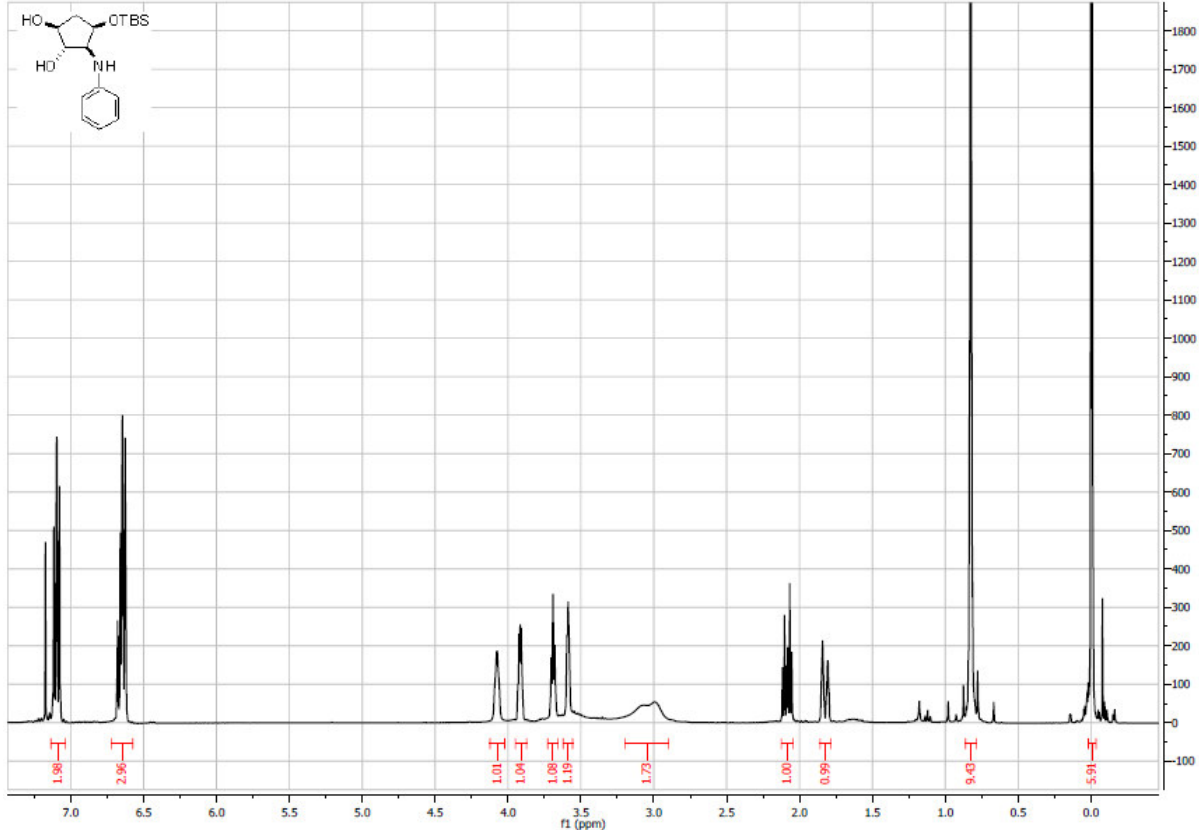

Compound **8a**:  $^{13}\text{C}$  NMR in  $\text{CDCl}_3$

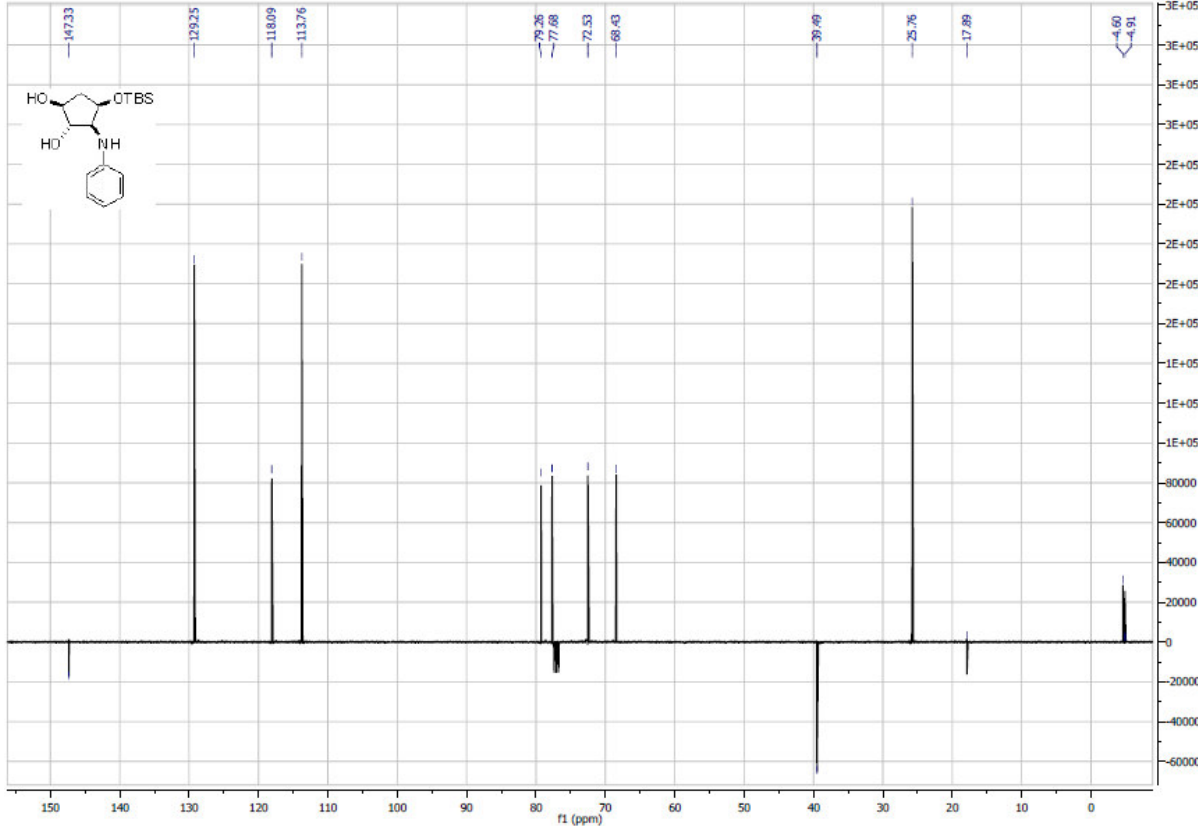

Compound **8c**:  $^1\text{H}$  NMR in  $\text{CDCl}_3$

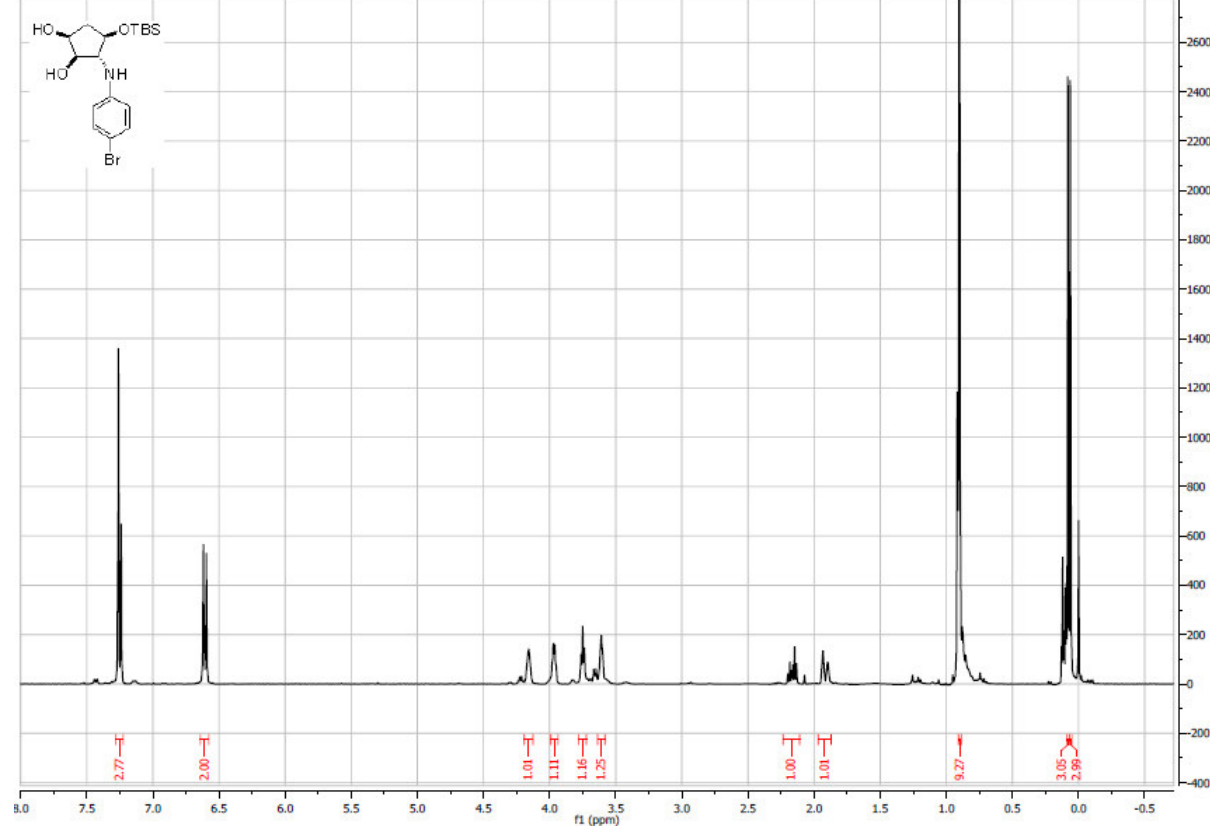

Compound **8c**:  $^{13}\text{C}$  NMR in  $\text{CDCl}_3$

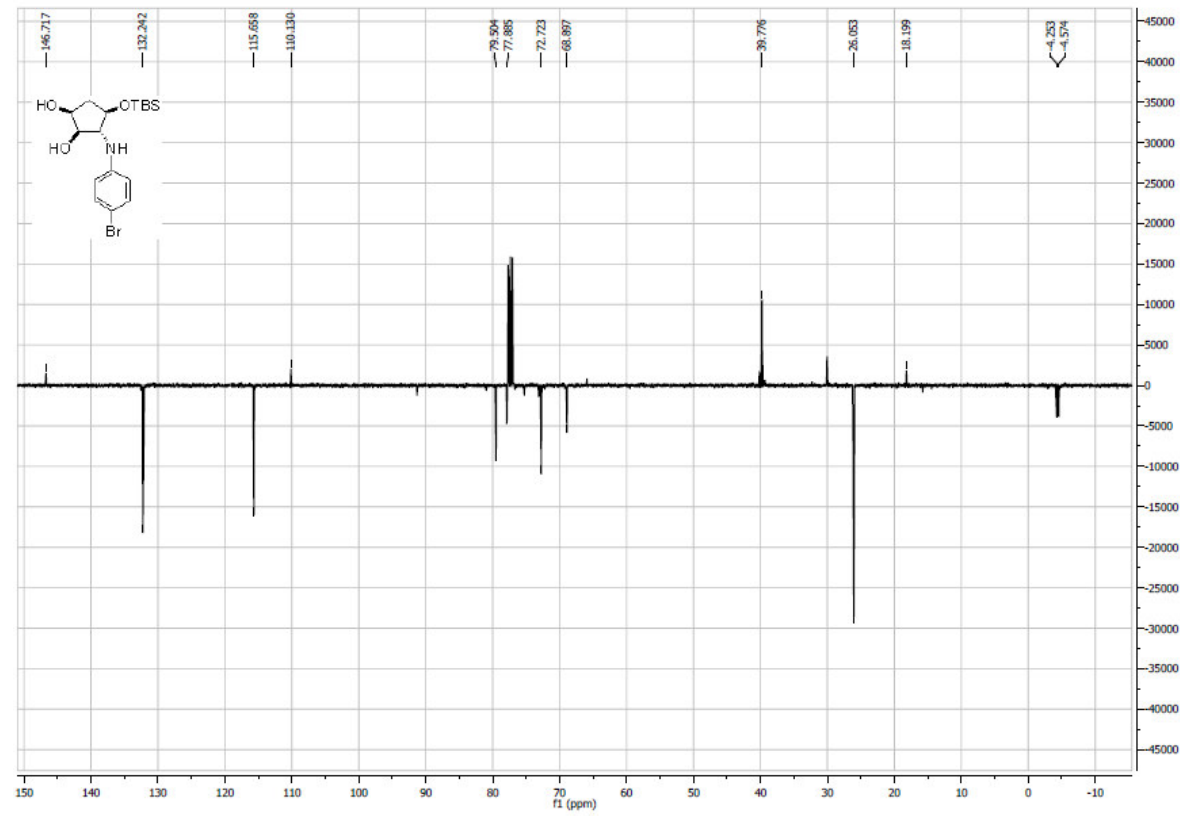

Compound **8d**:  $^1\text{H}$  NMR in  $\text{CDCl}_3$

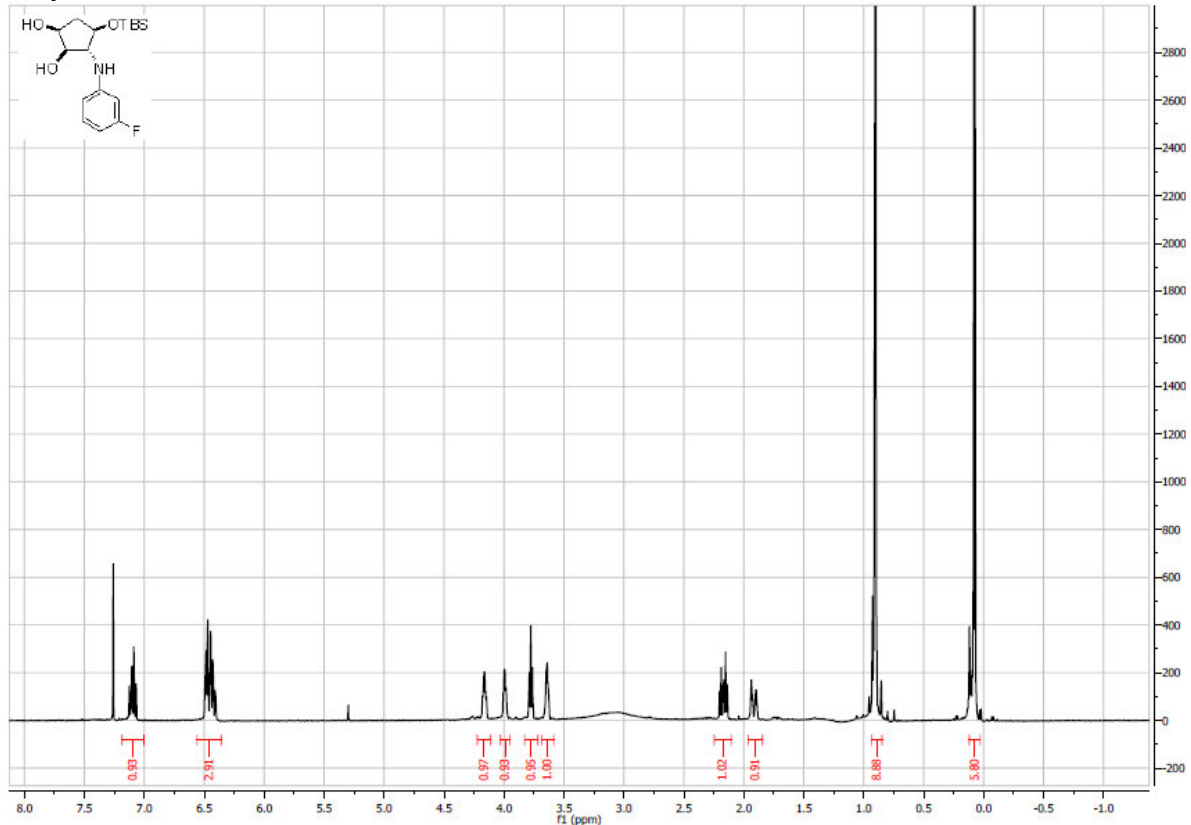

Compound **8d**:  $^{13}\text{C}$  NMR in  $\text{CDCl}_3$

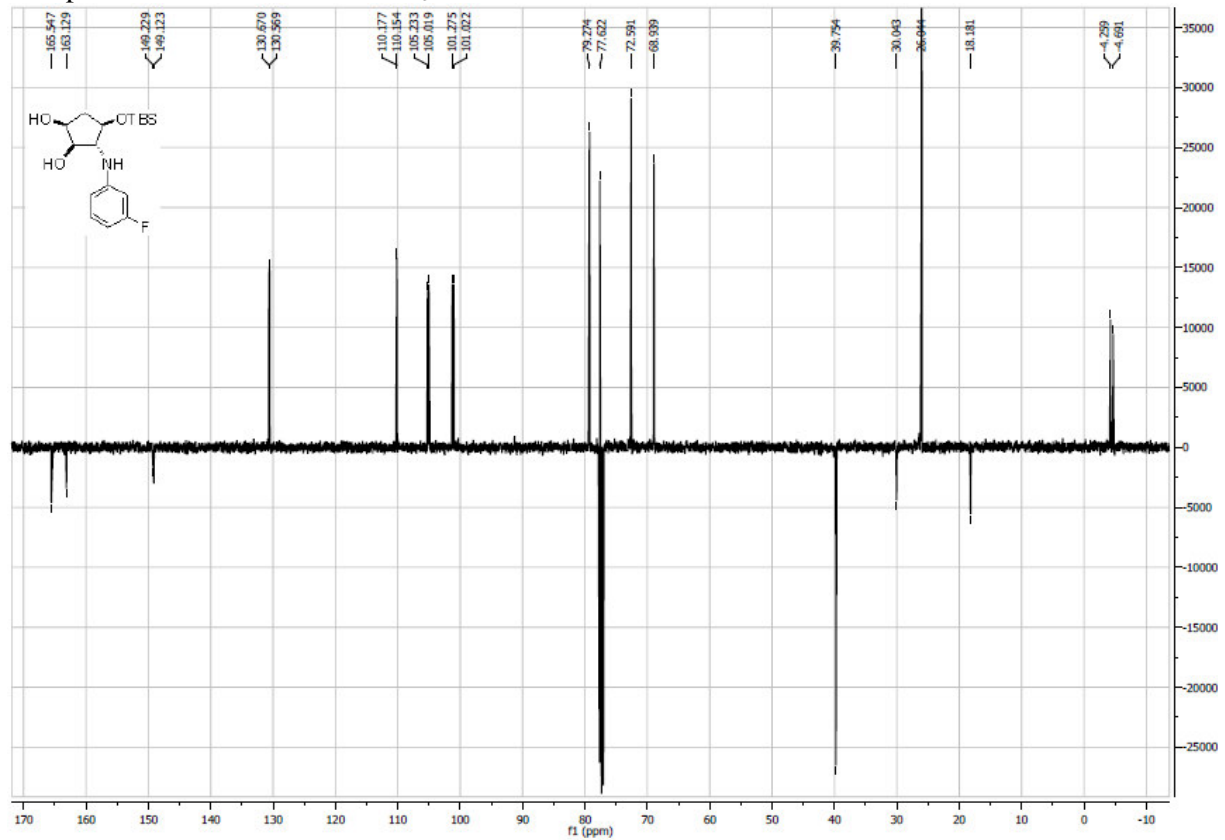

Compound **8e**:  $^1\text{H}$  NMR in  $\text{CDCl}_3$

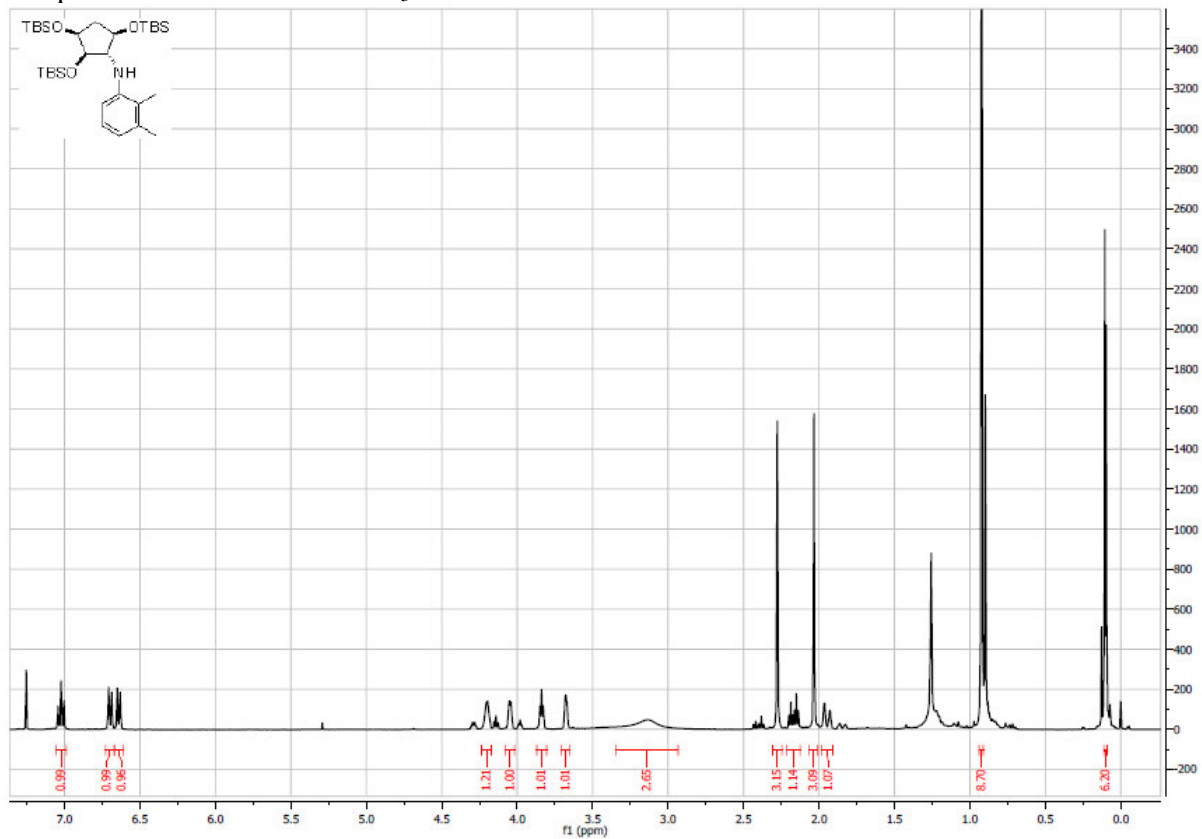

Compound **8e**:  $^1\text{H}$  NMR in  $\text{CDCl}_3$

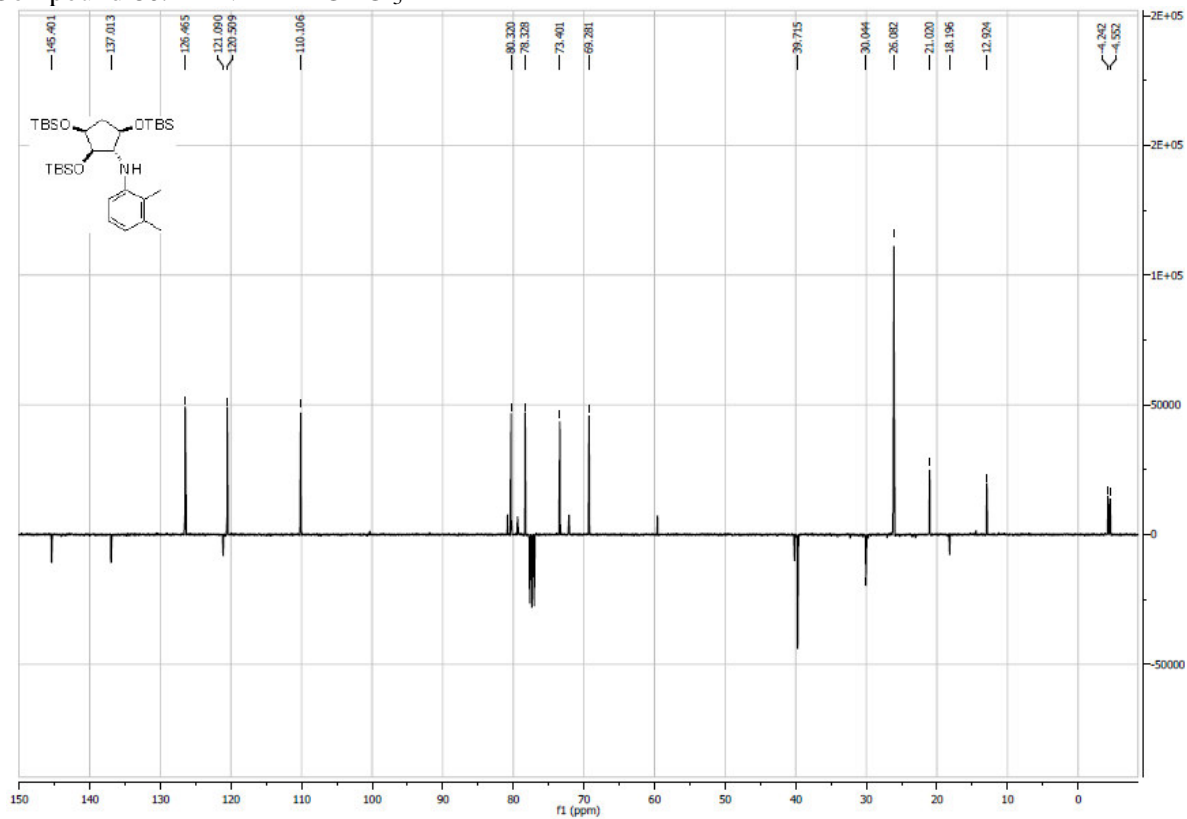



Compound **8f**:  $^1\text{H}$  NMR in  $\text{CDCl}_3$

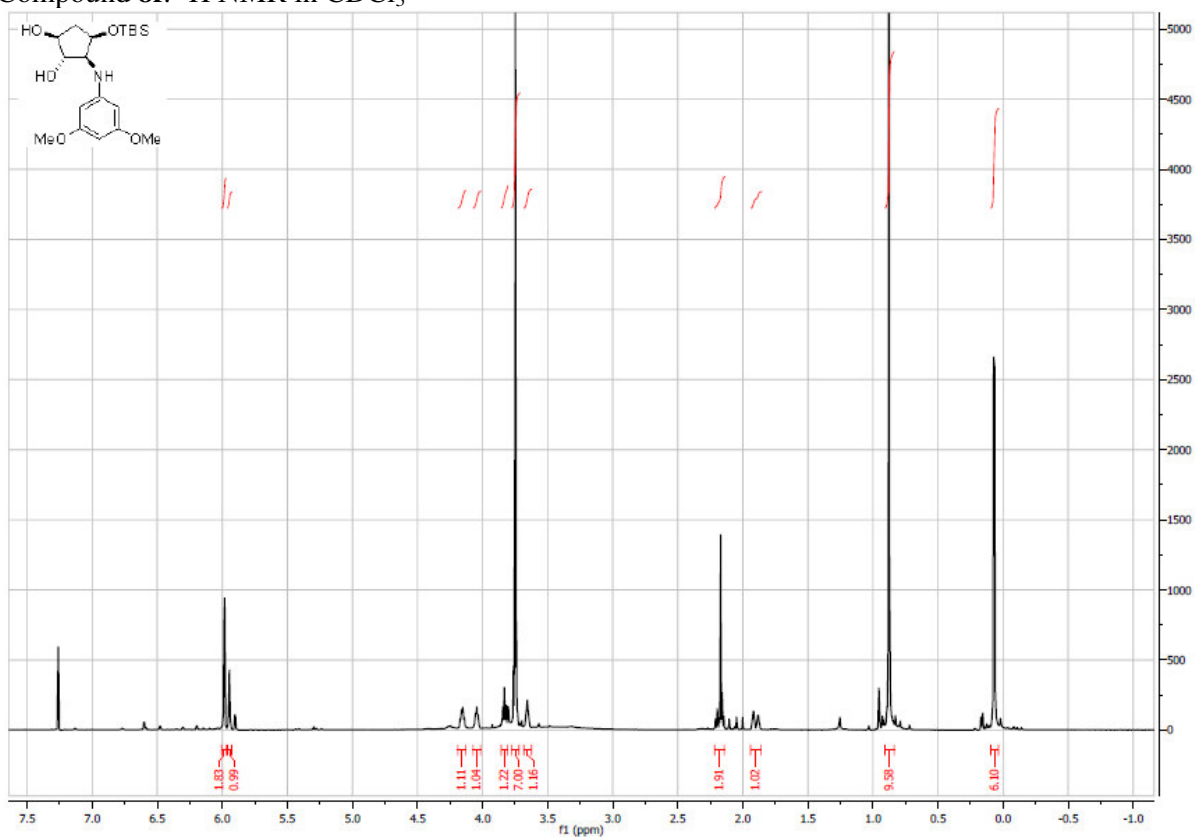

Compound **8f**:  $^{13}\text{C}$  NMR in  $\text{CDCl}_3$

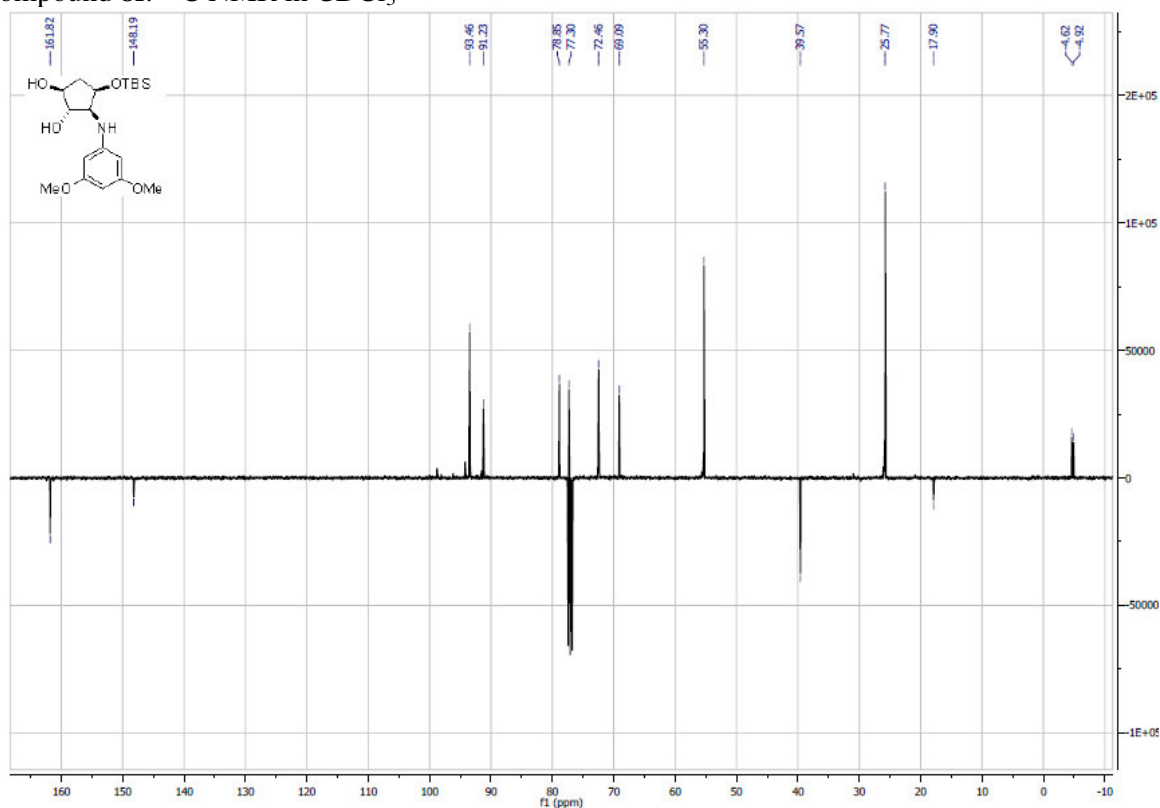

Compound 10:  $^1\text{H}$  NMR in  $\text{CDCl}_3$

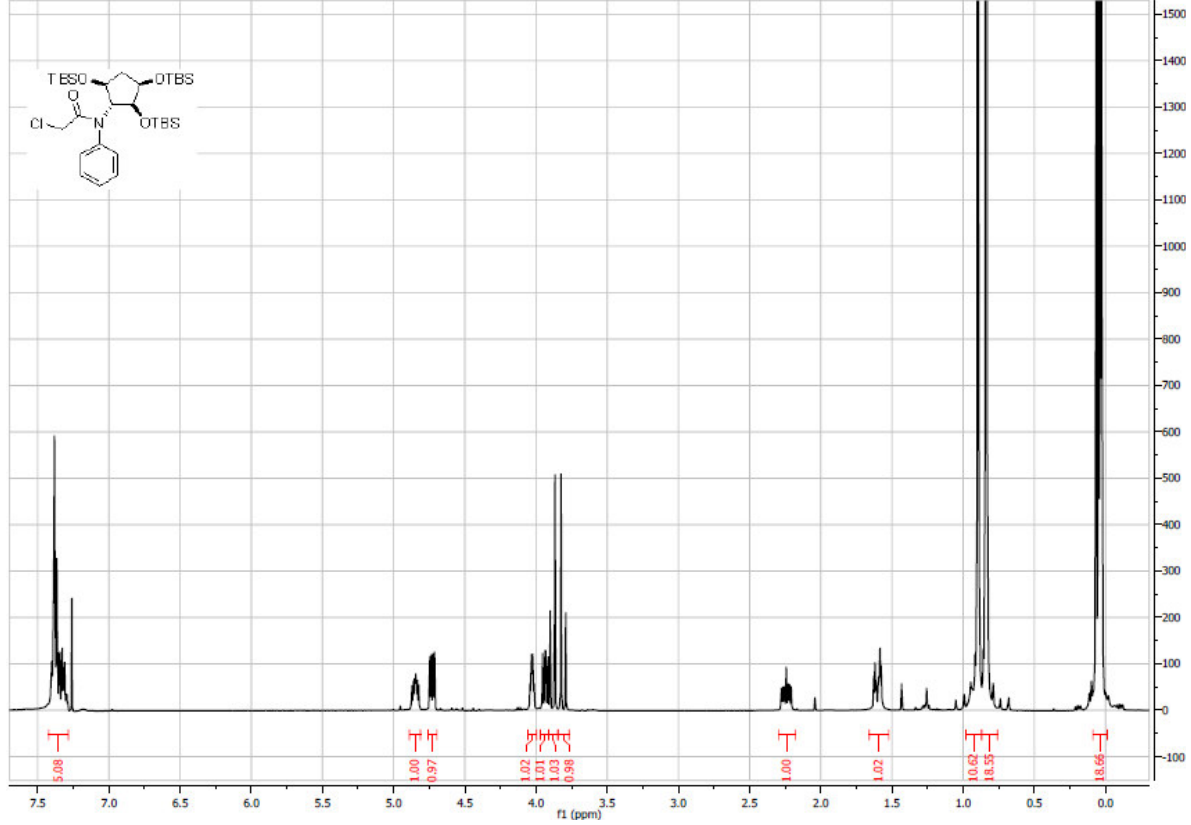

Compound 10:  $^{13}\text{C}$  NMR in  $\text{CDCl}_3$

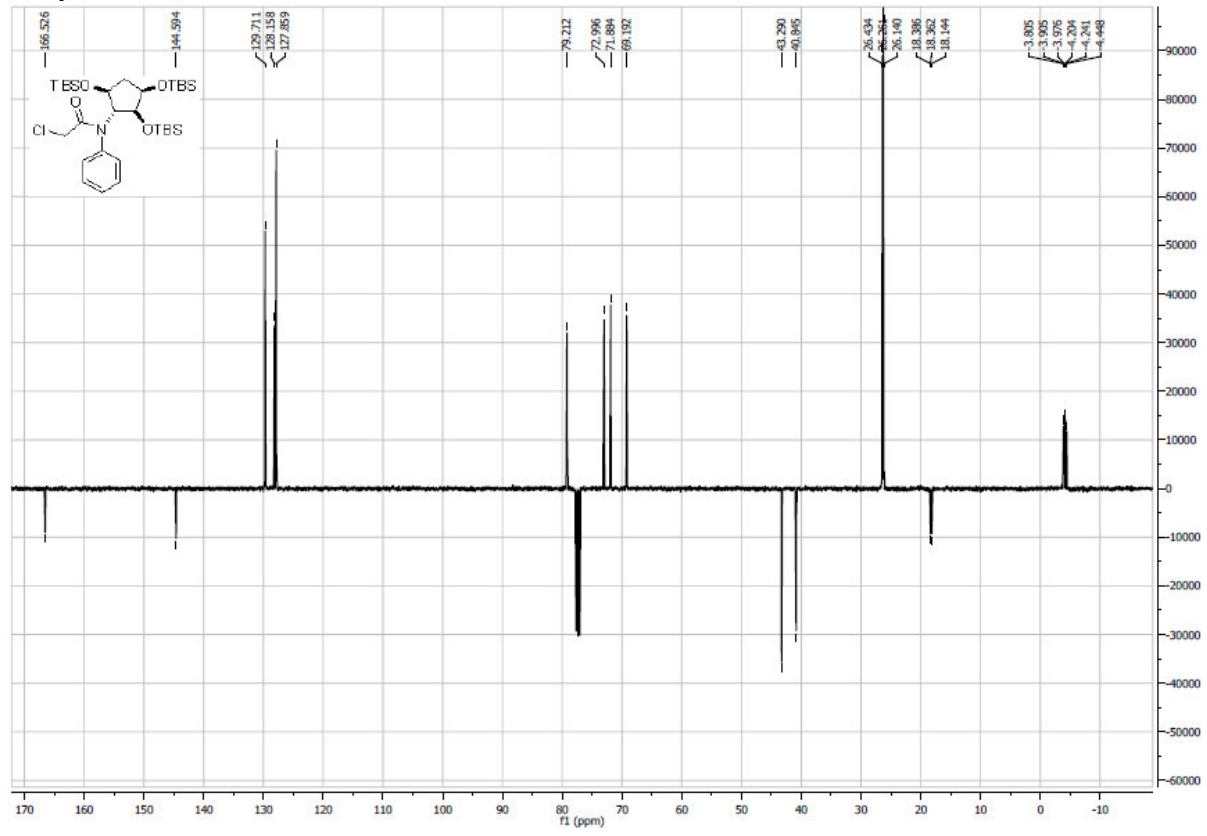

Compound 12: <sup>1</sup>H NMR in CDCl<sub>3</sub>

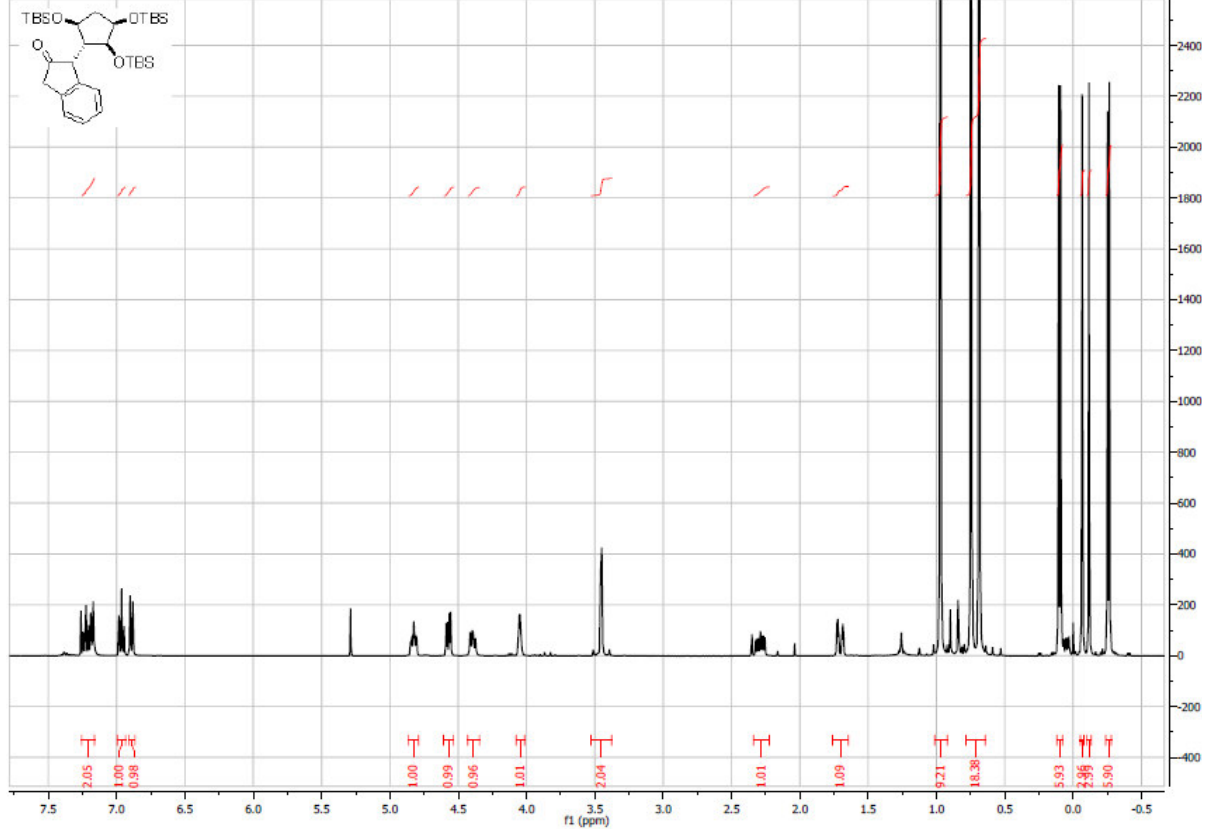

Compound 12: <sup>13</sup>C NMR in CDCl<sub>3</sub>

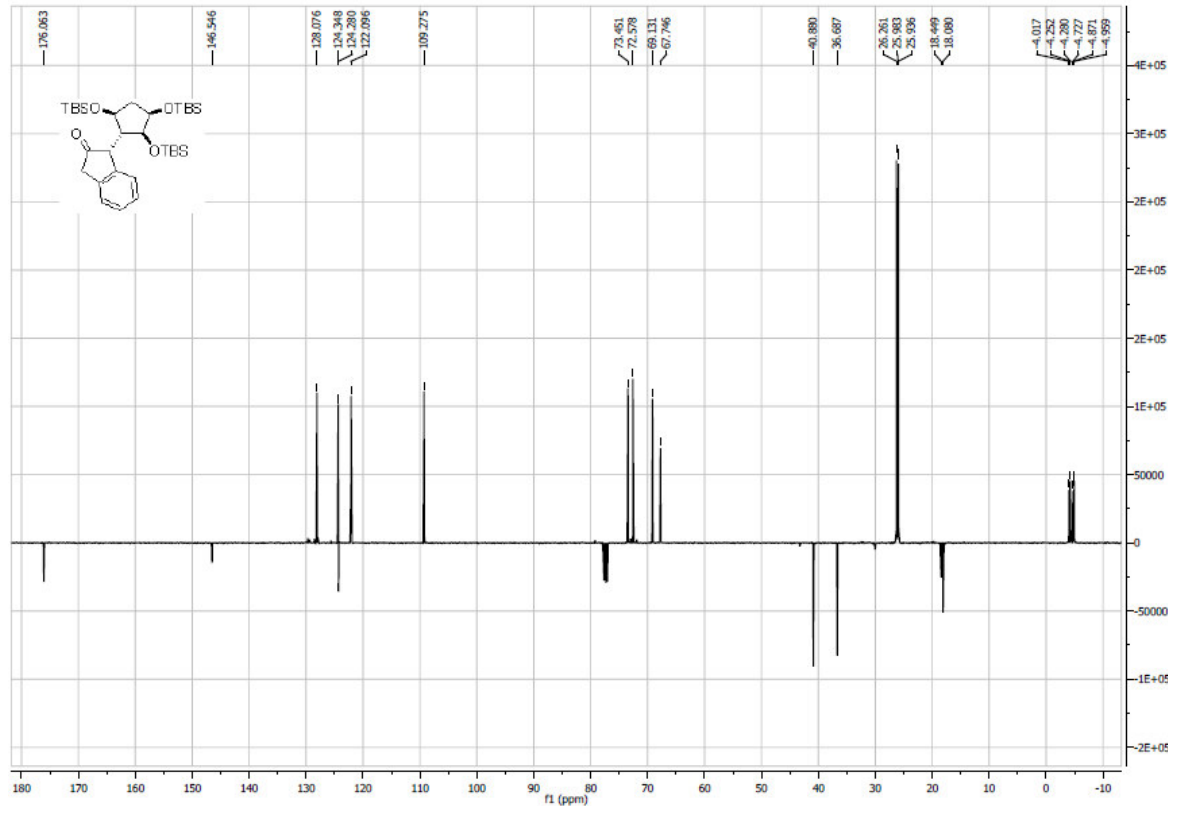

Compound 15: <sup>1</sup>H NMR in CDCl<sub>3</sub>

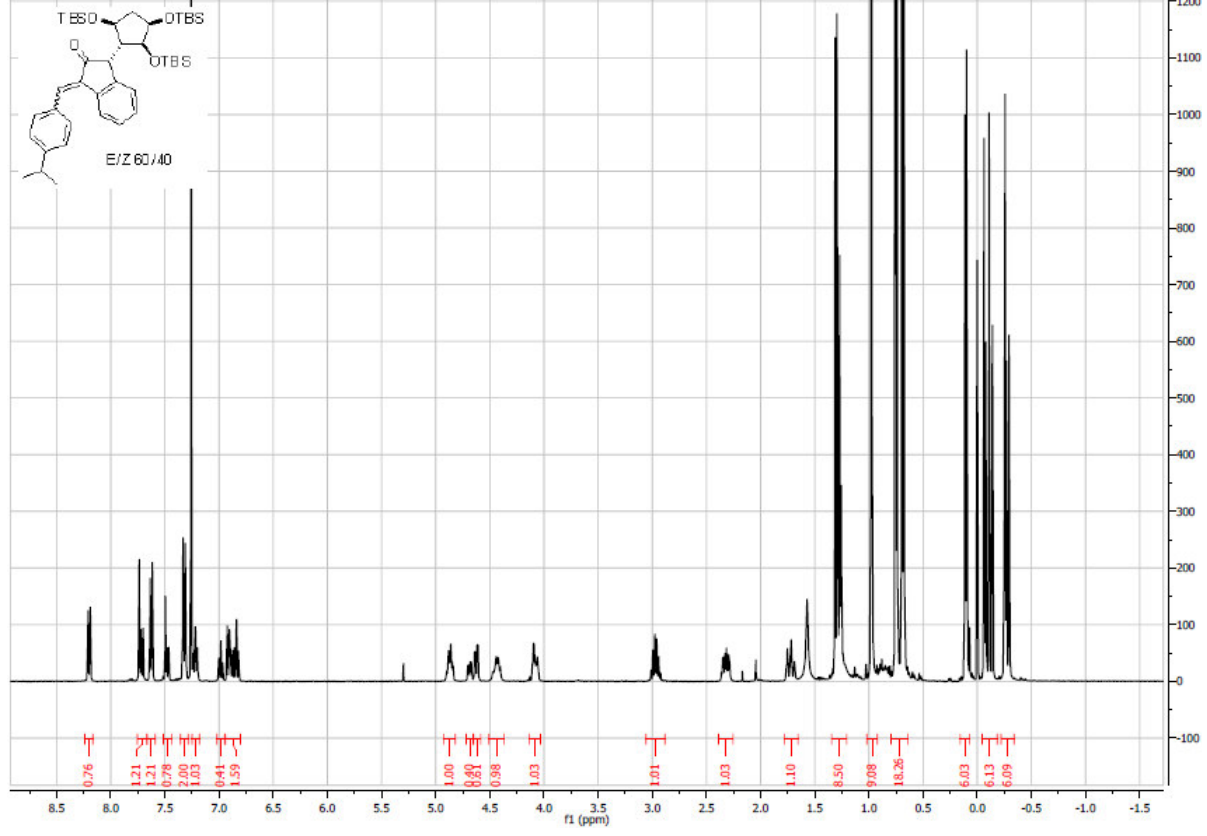

Compound 15: <sup>13</sup>C NMR in CDCl<sub>3</sub>

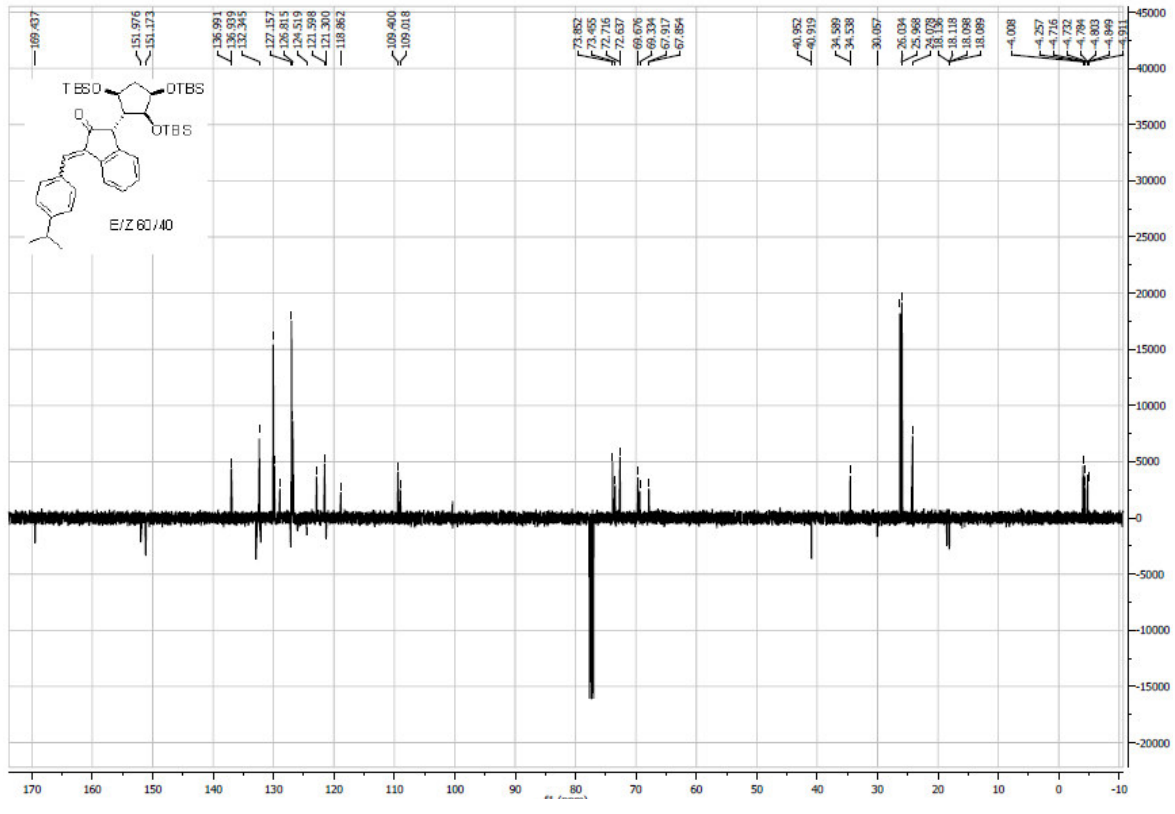

Compound 16:  $^1\text{H}$  NMR in  $\text{CD}_3\text{OD}$

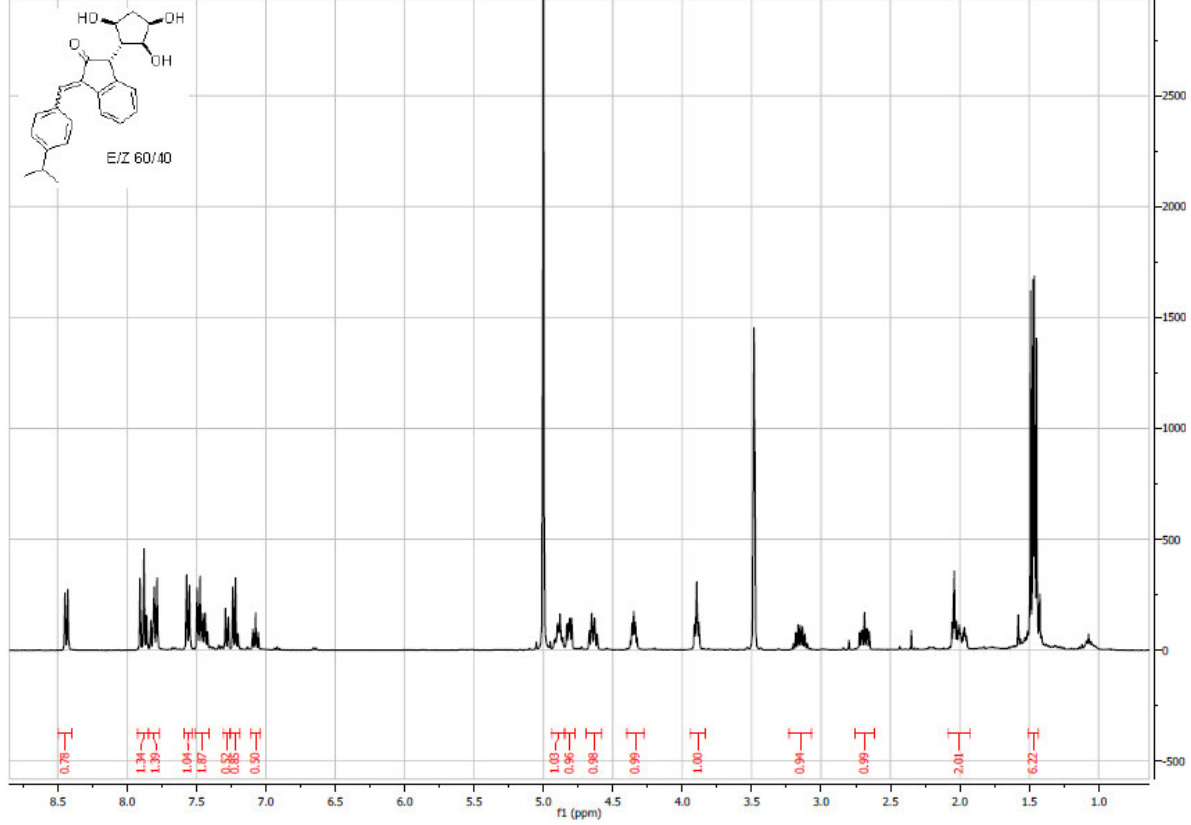

Compound 16:  $^{13}\text{C}$  NMR in  $\text{CD}_3\text{OD}$

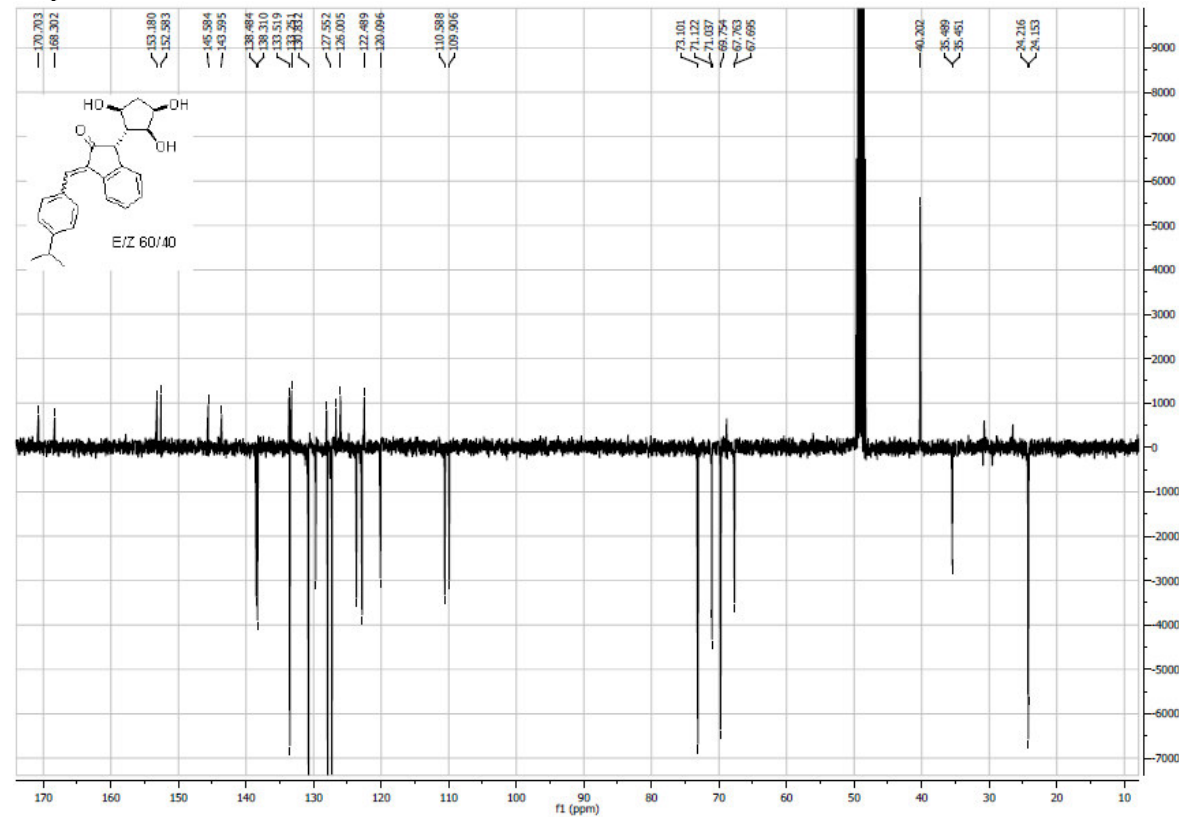

Compound 18:  $^1\text{H}$  NMR in  $\text{CDCl}_3$

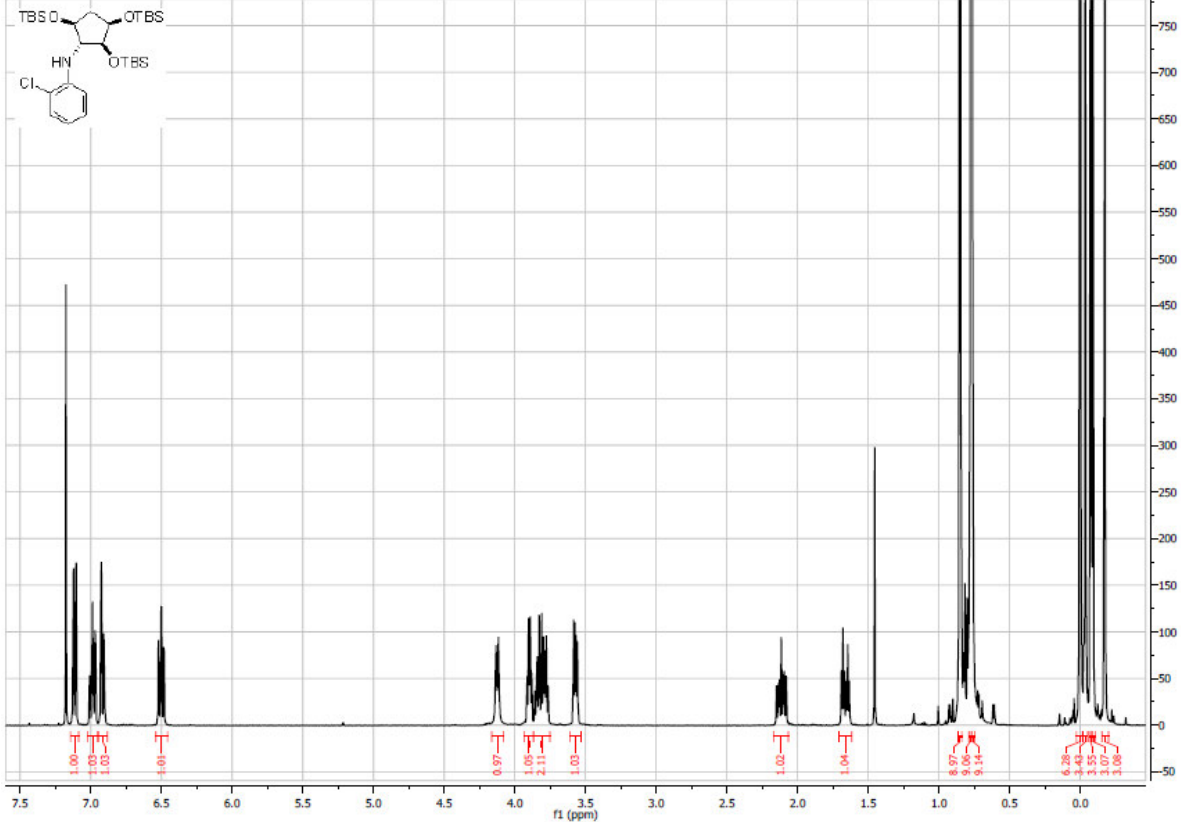

Compound 18:  $^{13}\text{C}$  NMR in  $\text{CDCl}_3$

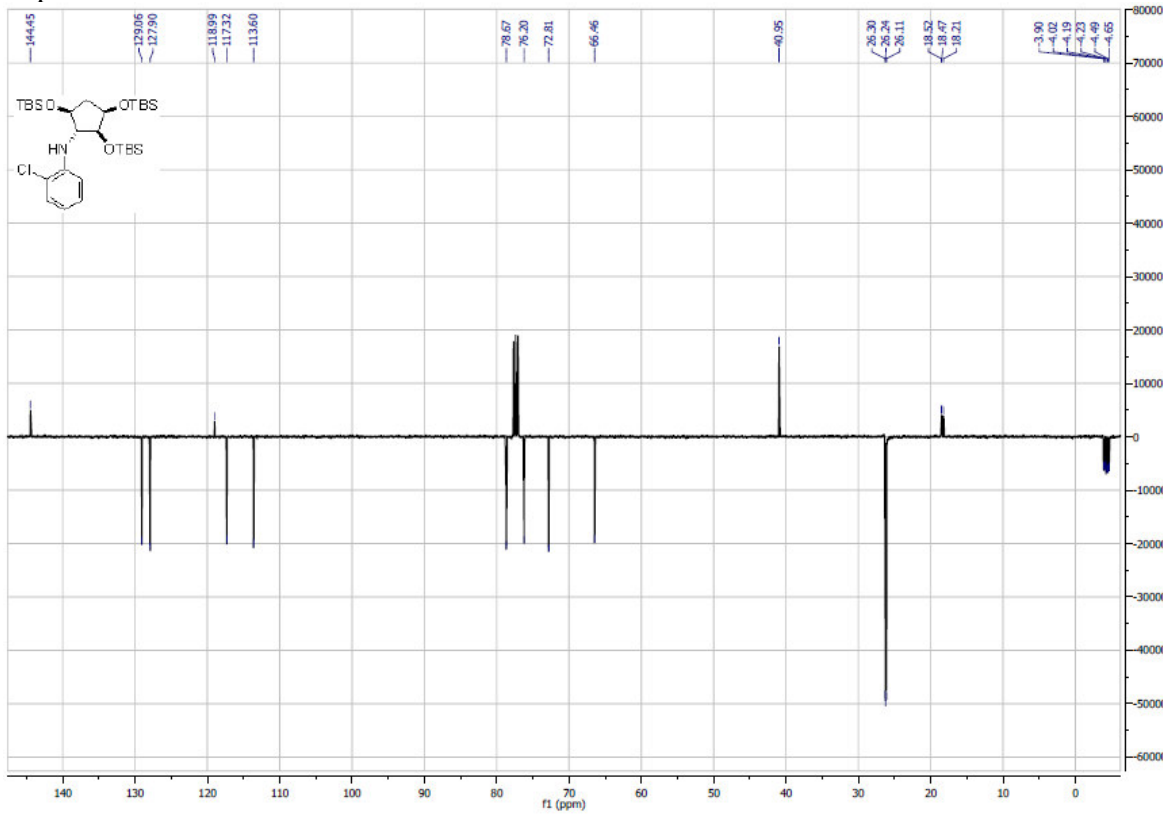

Compound 19:  $^1\text{H}$  NMR in  $\text{CDCl}_3$

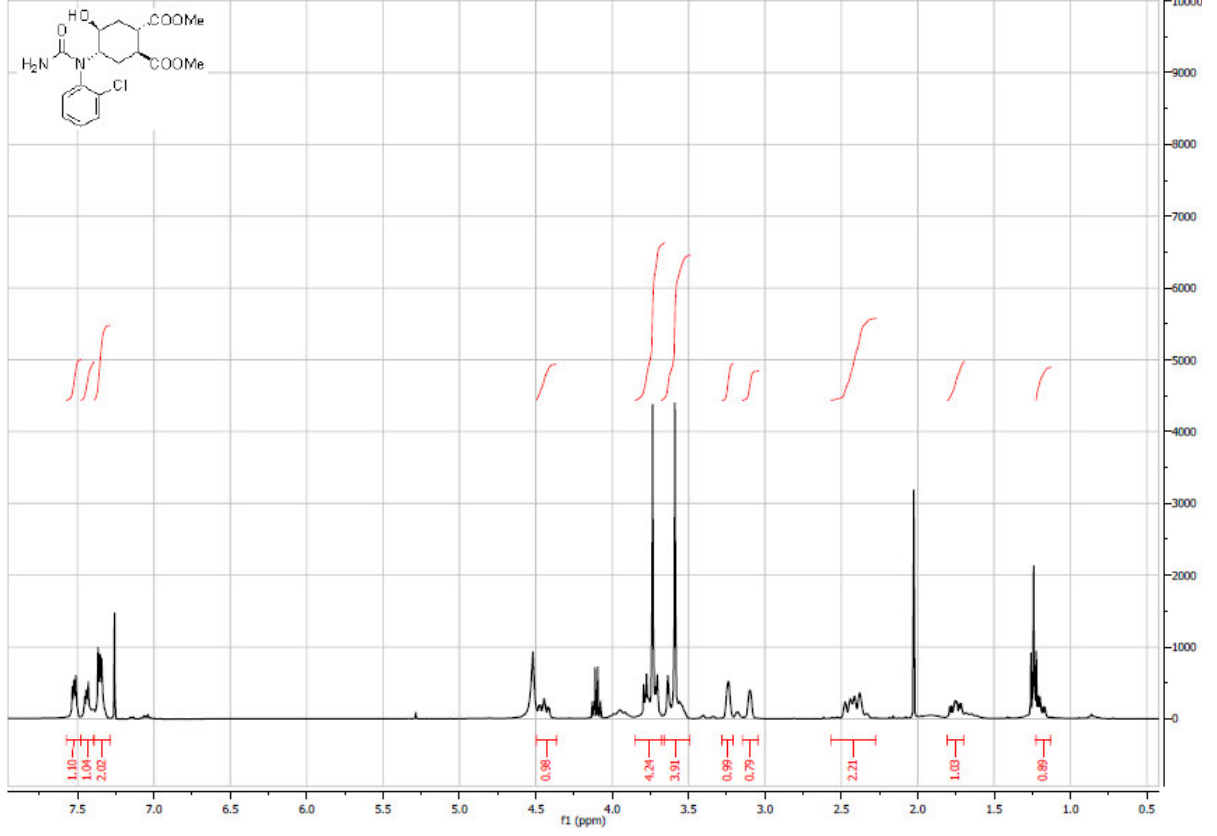

Compound 19:  $^{13}\text{C}$  NMR in  $\text{CDCl}_3$

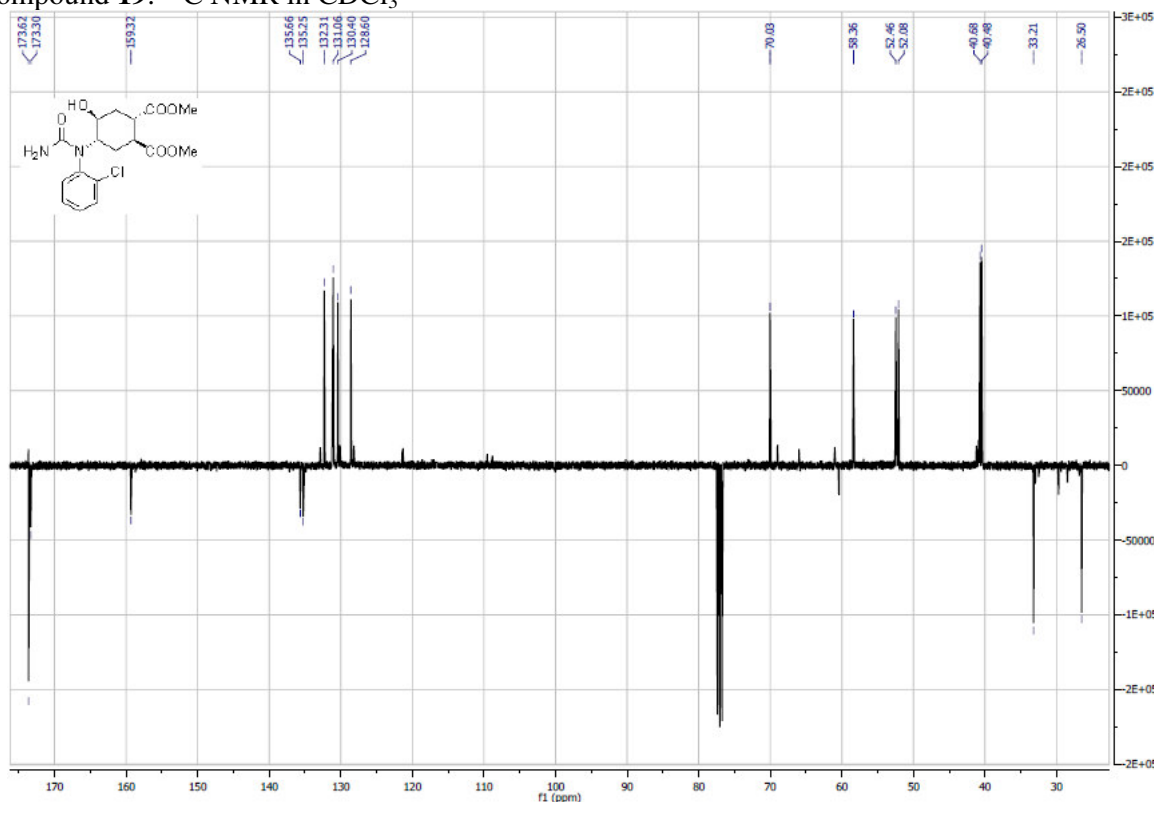

Compound 20:  $^1\text{H}$  NMR in  $\text{C}_6\text{D}_6$

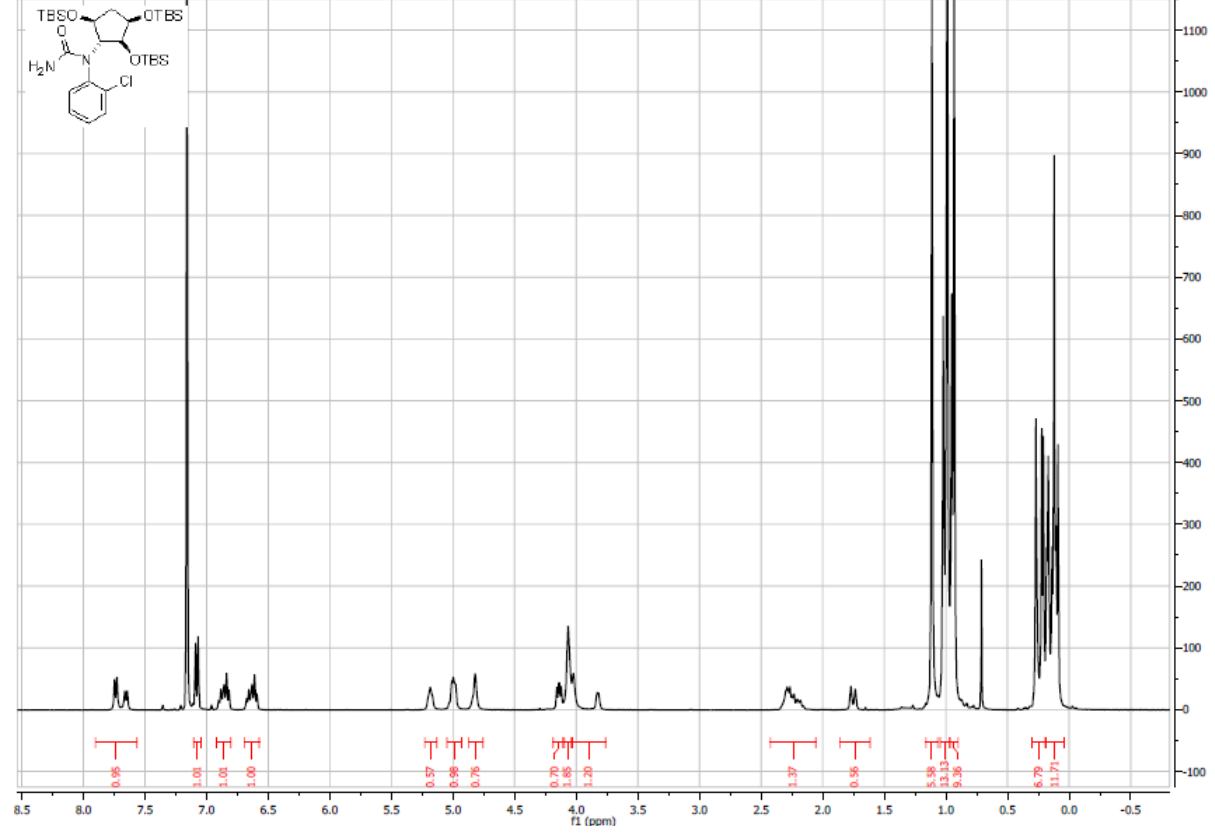

Compound 20:  $^{13}\text{C}$  NMR in  $\text{C}_6\text{D}_6$

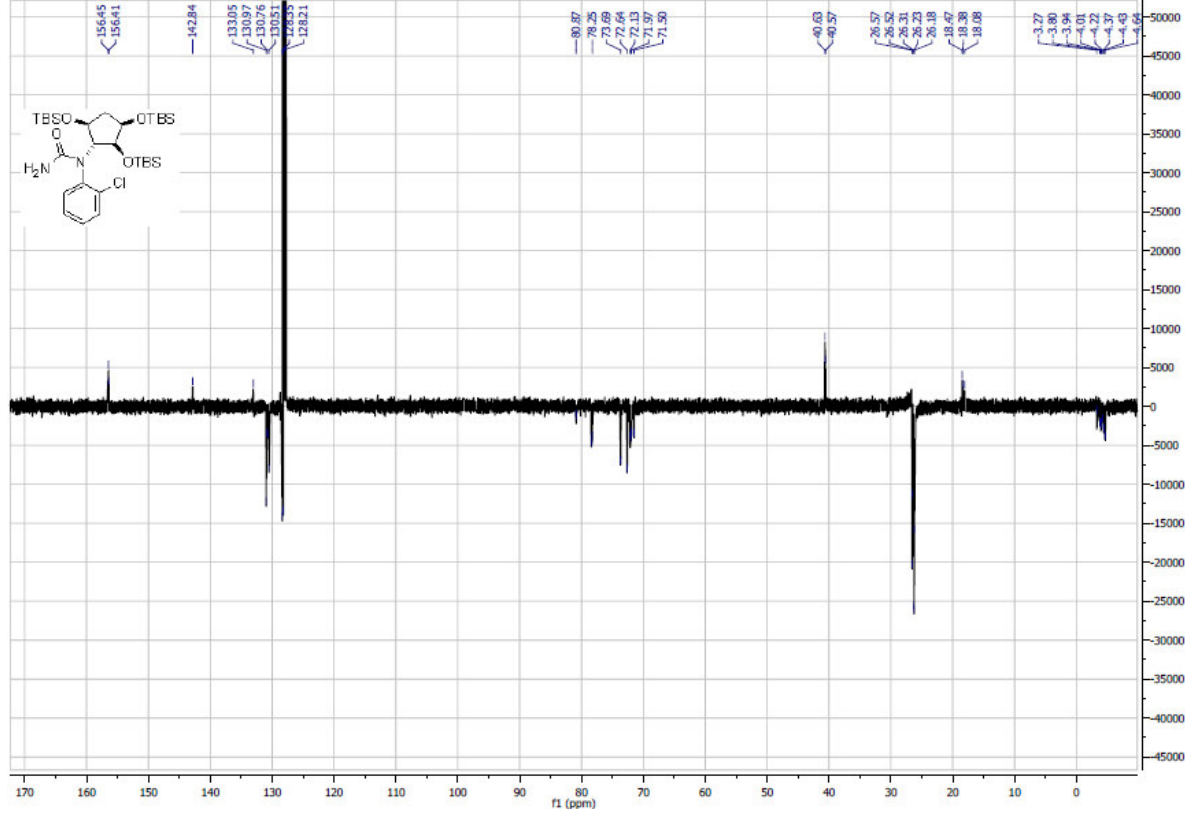



Compound 22:  $^1\text{H}$  NMR in  $\text{CDCl}_3$

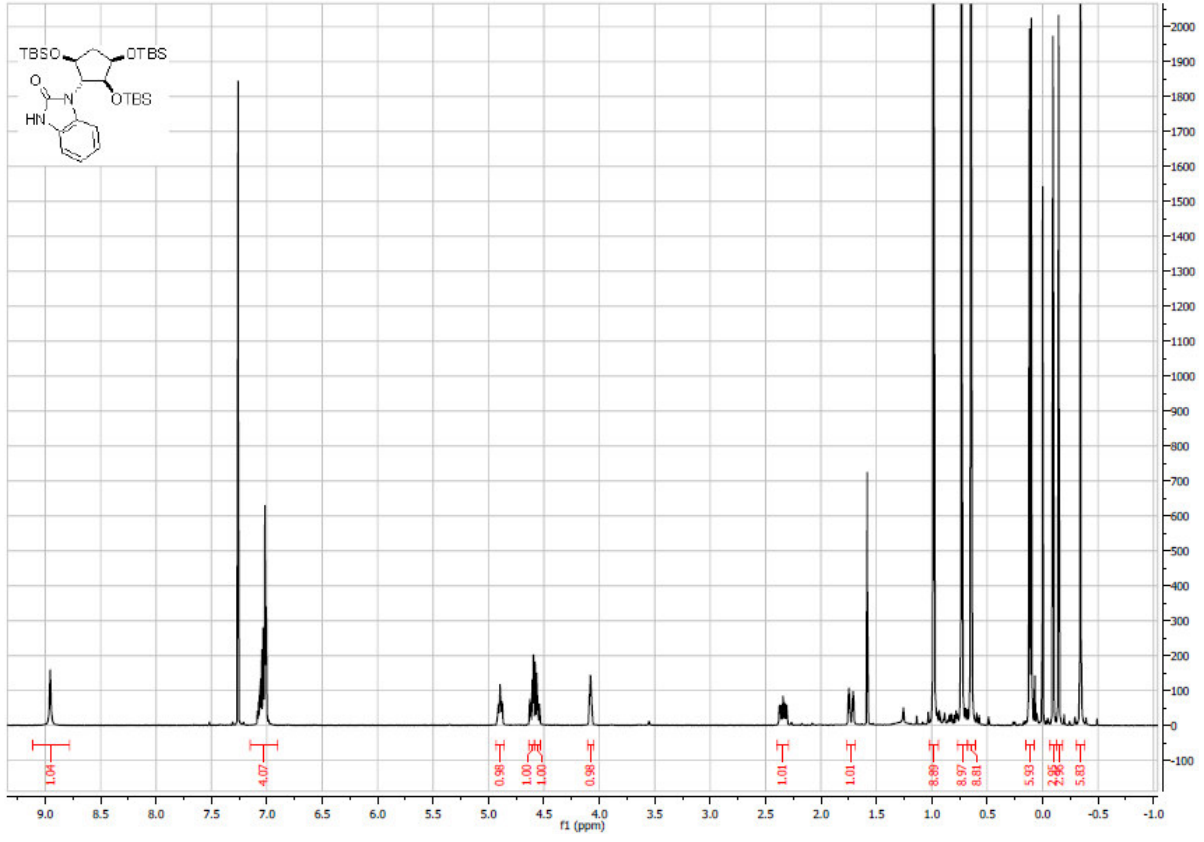

Compound 22:  $^{13}\text{C}$  NMR in  $\text{CDCl}_3$

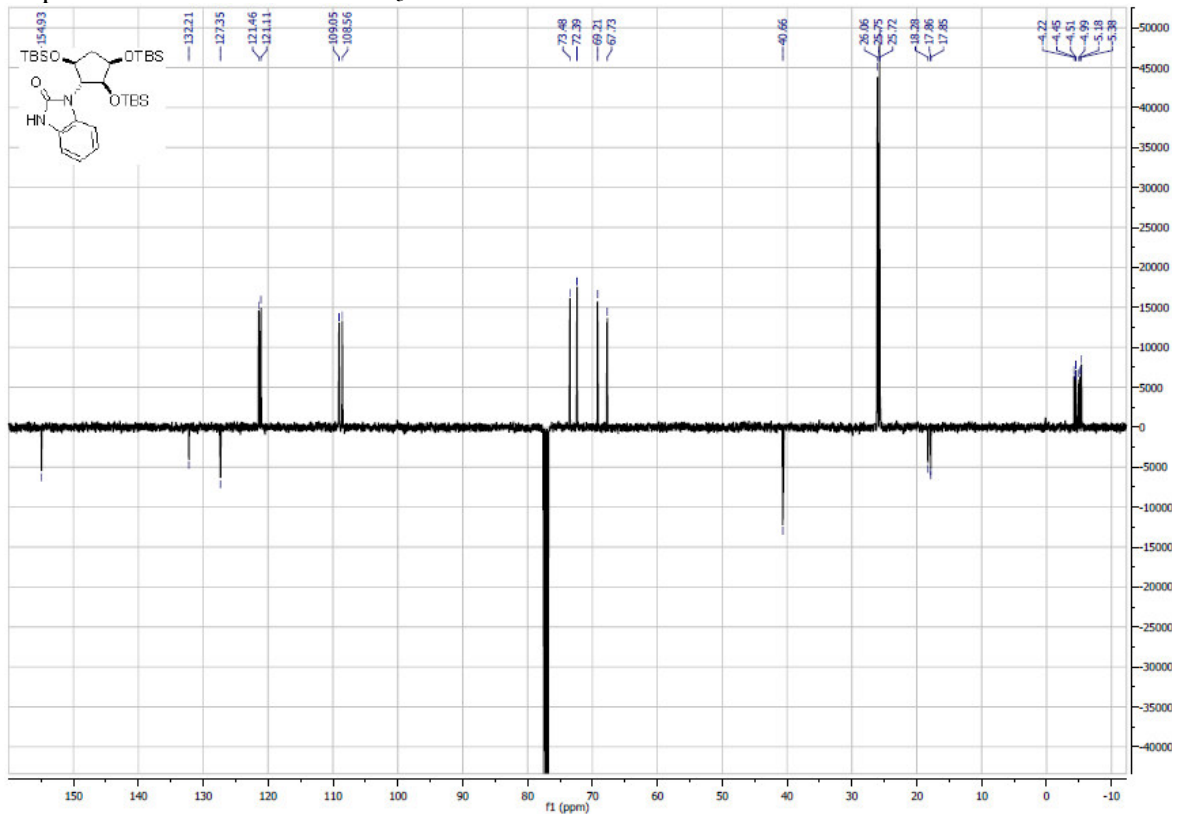

Compound 23:  $^1\text{H}$  NMR in  $\text{CD}_3\text{OD}$

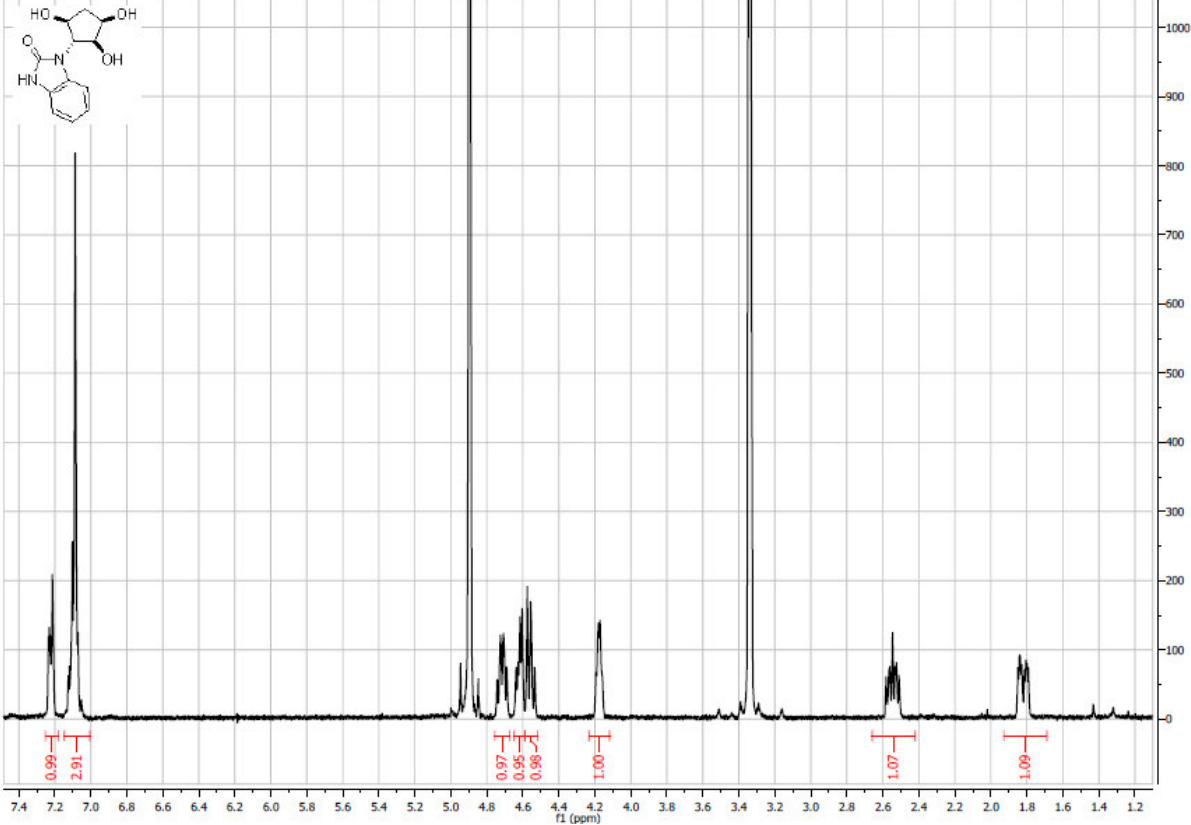

Compound 23:  $^{13}\text{C}$  NMR in  $\text{CD}_3\text{OD}$

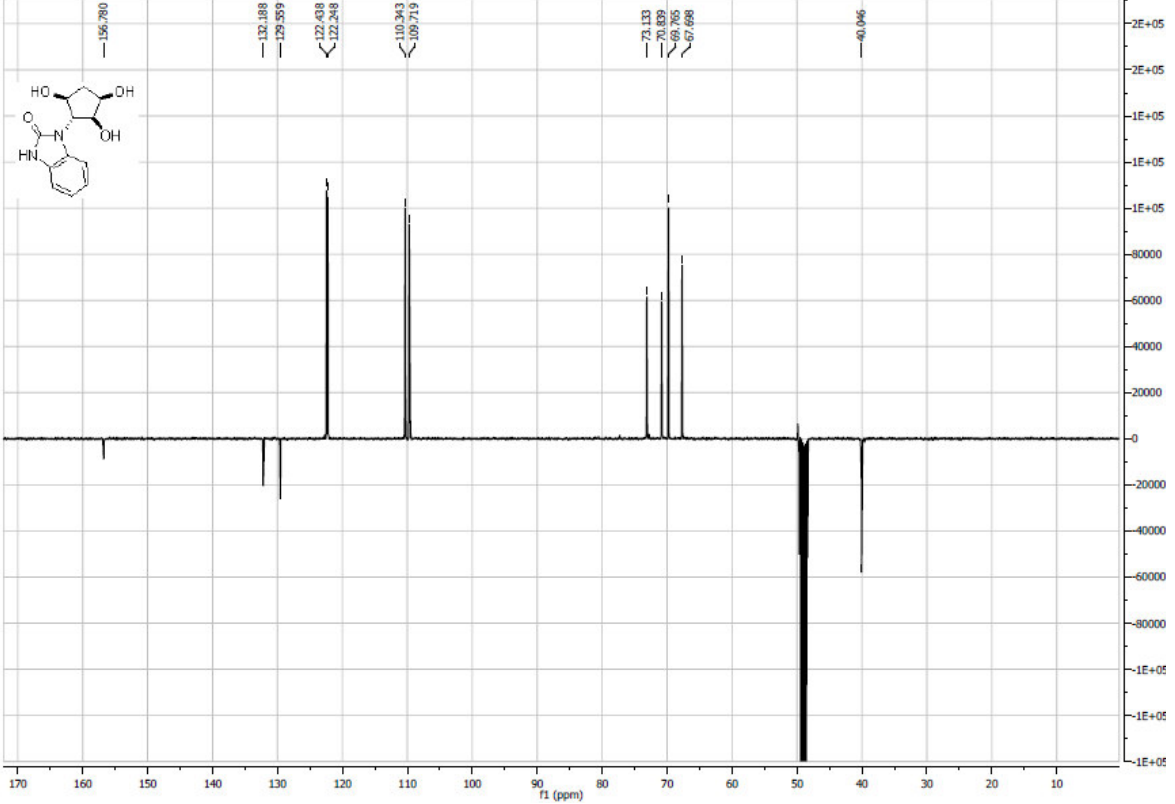

Supplement: mmc1 [file mmc1.pdf]
